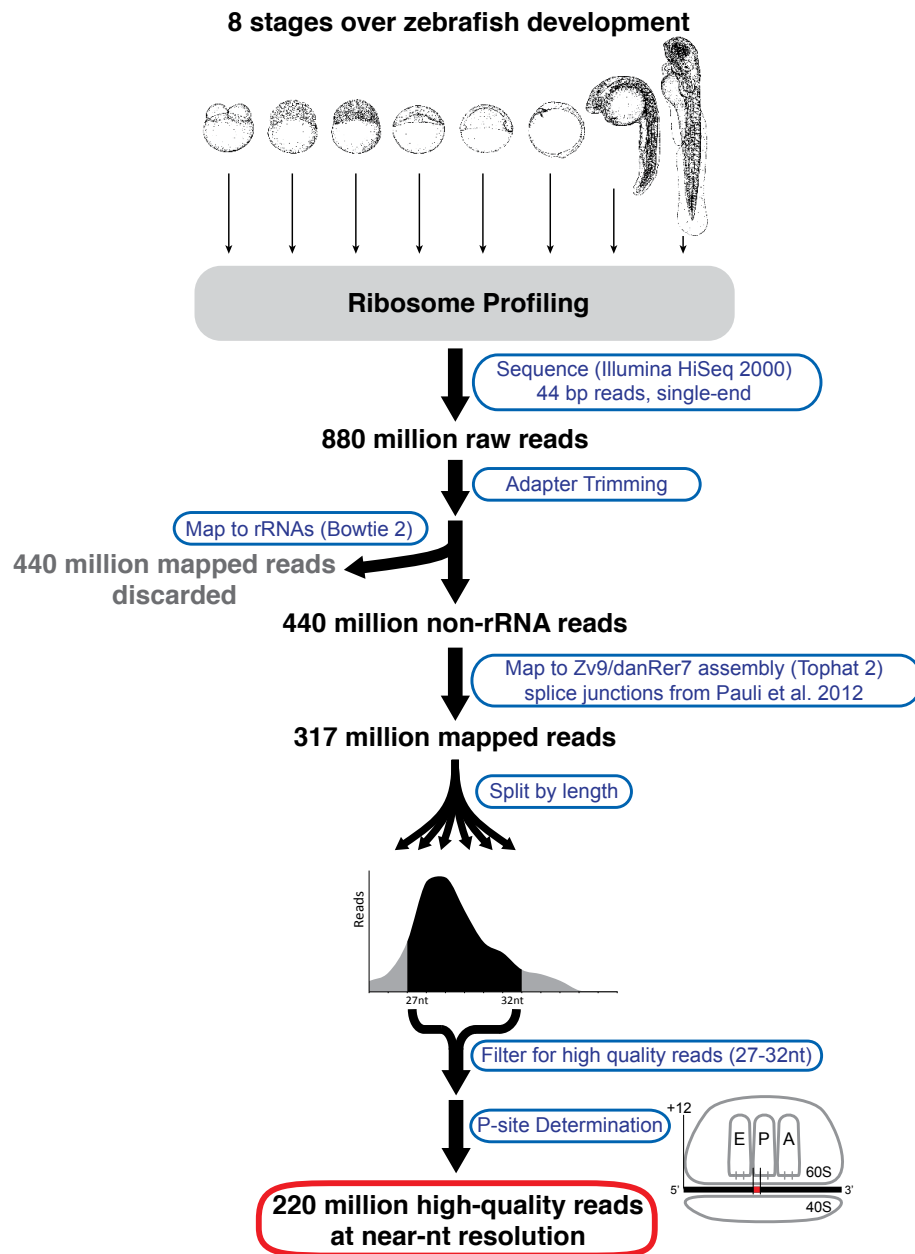

**Fig. S1. Schematic for sequencing and mapping of ribosome protected fragments.** For details, see Materials and methods in main text.

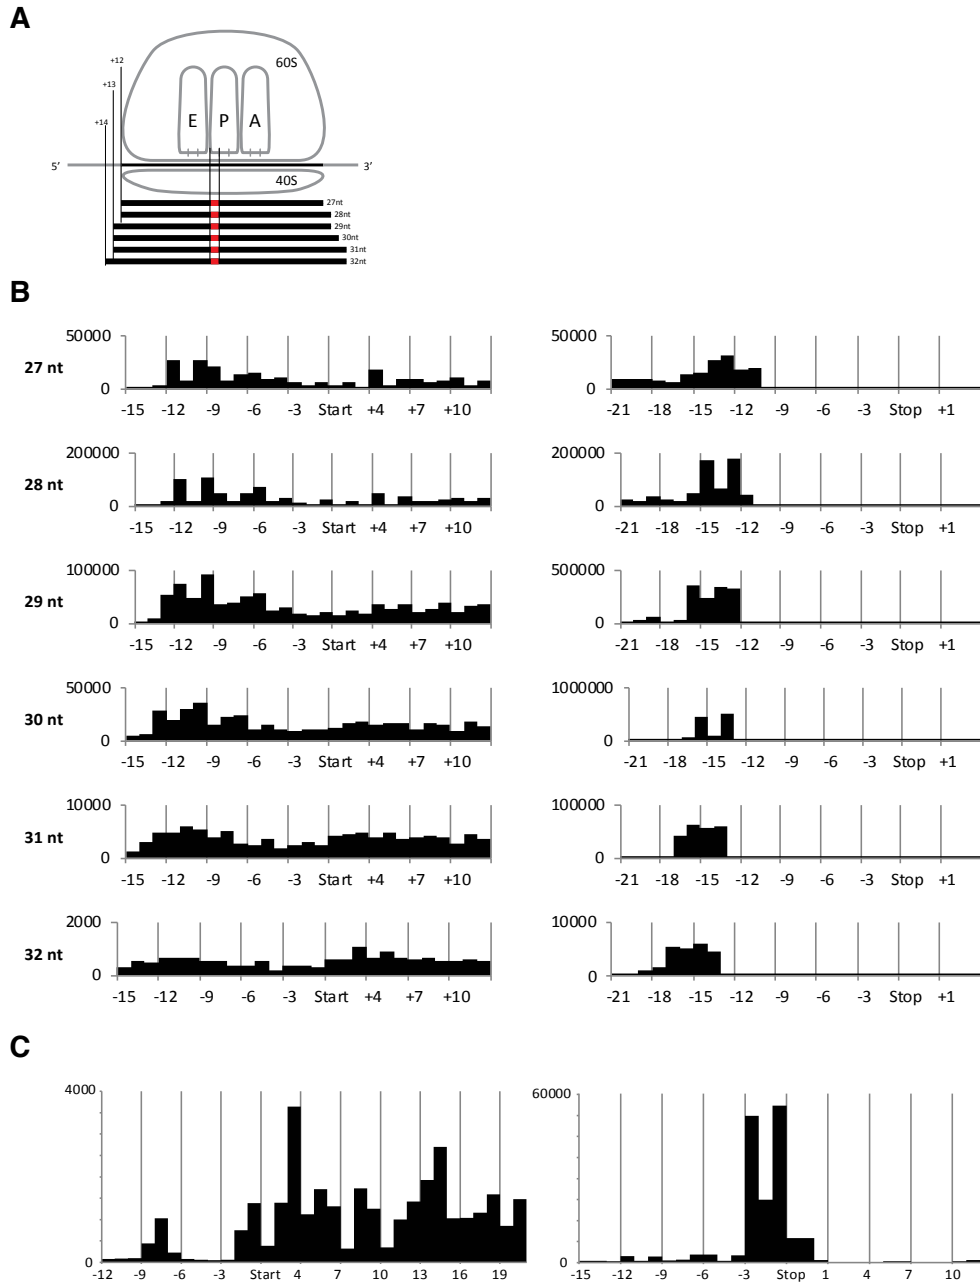

**Fig. S2. Determination of P-site positions of mapped reads from ribosome profiling.** Single-nucleotide mapping of RPF reads. **(A)** Schematic for the offset from the leftmost position of reads of various lengths. Position of red nucleotide corresponds to the first position of the P-site in the 80s ribosome. **(B)** Leftmost position of RPF reads as a function of read length. Leftmost positions of the mapped RPFs are stratified over the start (left) and stop (right) codons of a RefSeq metagene. **(C)** P-site position of mapped reads following offset correction, stratified over the start (left) and stop (right) codon of a RefSeq metagene. A strong peak is observed at the codon position just prior to the stop codon.

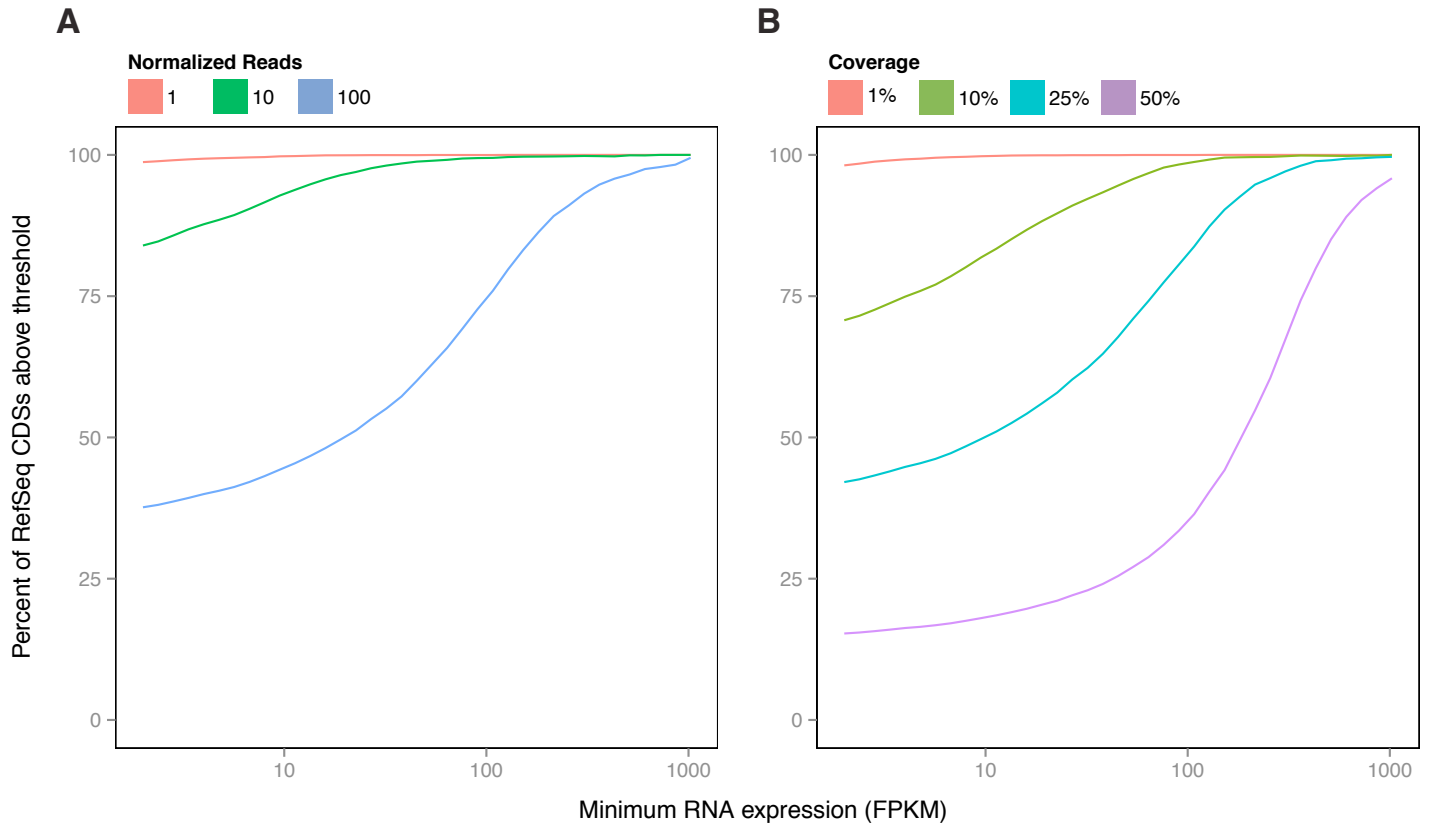

**Fig. S3. Ribosome profiling statistics of expressed RefSeq genes.** (A) Sum of RPF reads associated with the CDSs of expressed RefSeq genes relative to minimum transcript expression levels. The plot shows the fraction of RefSeq CDSs (y axis) associated with at least 1, 10 or 100 summed normalized RPFs. (B) RPF-coverage of the CDSs of expressed RefSeq genes relative to minimum transcript expression levels. The plot shows the fraction of RefSeq genes (y axis) having at least 1, 10, 25 or 50% (color scale) of all nucleotides within their coding regions covered by one or more RPFs. RPFs are evaluated at single nucleotide level, and a single RPF can therefore only cover one nucleotide. For example, 68.19% of RefSeq genes expressed at >1 FPKM have 10% of their nucleotides covered by at least one RPF. Note that the fraction of genes above the thresholds [normalized sum (A) or coverage (B)] increase with increasing RNA expression levels (FPKM).

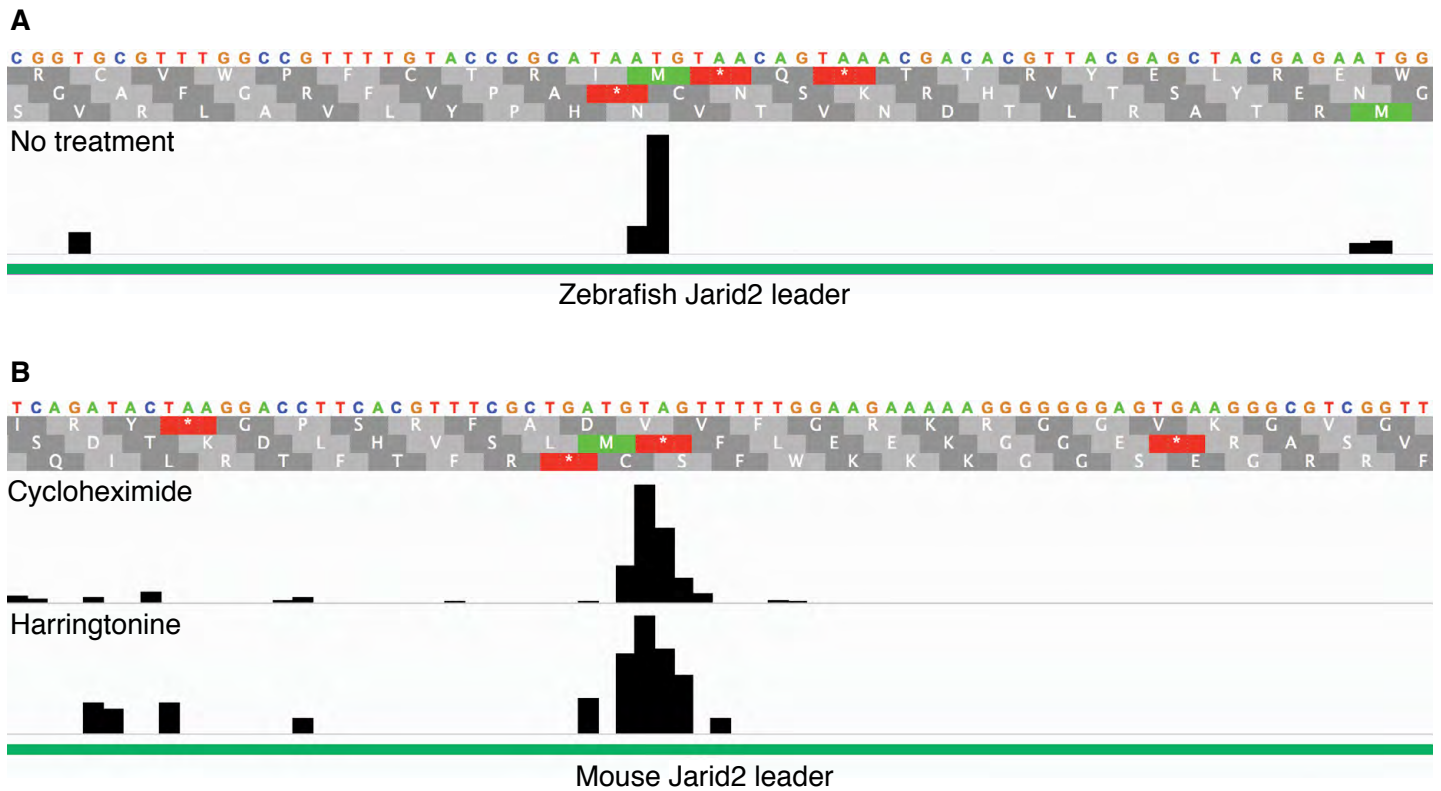

**Fig. S4. Examples of minORFs in the leader sequence of *Jarid2* in zebrafish and mouse.** (A,B) minORFs in zebrafish (A) and mouse (B) were identified as distinct peaks of RPF enrichment over Start-Stop sequences in 5' leaders. For the majority of minORFs, initiation at an upstream alternative Start codon is unlikely owing to the absence of upstream in frame initiation codons. Additional support for the existence of minORFs comes from ribosome profiling experiments in mouse ESCs in the presence of harringtonine (Ingolia et al., 2011). Although our RPF data does not show a distinctive enrichment of RPF reads at initiation codons (no drug pre-treatment), harringtonine leads to an accumulation of ribosomes over the initiating codon (Ingolia et al., 2011). RPF densities of harringtonine-treated mESCs resemble those of cycloheximide-treated mESCs (B), suggesting that initiation does indeed occur at the AUG immediately preceding the STOP codon. Asterisks in red boxes indicate the STOP codon.

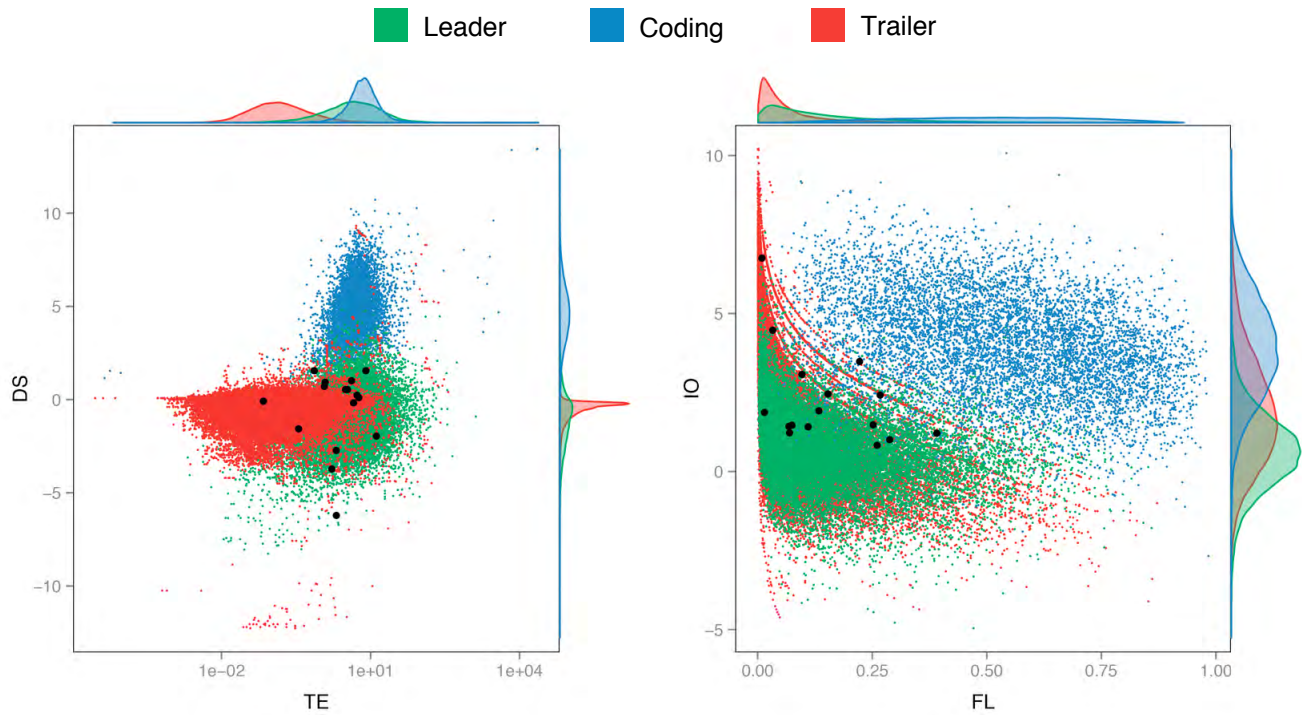

**Fig. S5. TOC distinguishes ORFs in 5' leaders, CDSs and 3' trailers of mouse genes.** A training set was constructed from mouse RefSeq genes using (1) annotated CDSs (coding ORFs) in the context of the whole transcript, (2) RPF-containing ORFs in 5' leader sequences in the context of the 5' leaders, and (3) RPF-containing ORFs in 3' trailers in the context of the 3' trailers. Training was performed as described for zebrafish (see main text and Fig. 3A), using the metrics translational efficiency (TE), inside versus outside (IO), fragment length (FL) and disengagement score (DS). The combination of the four metrics separates coding ORFs (blue), leaders (green) and trailers (red) of the training set. The density of each measure is shown along the axes. ORFs of well-annotated lncRNAs (black) are plotted on top of ORFs of the RefSeq training set and cluster with trailers and leaders. The ORF with the most bases covered by RPFs was used to represent each lncRNA. Shown are 18 mouse lncRNAs: *Adapt33*, *Gas5*, *H19*, *Malat1*, *Meg3*, *Neat1*, *Rian*, *SNHG1*, *SNHG3*, *SNHG4*, *SNHG5*, *SNHG6*, *SNHG7*, *SNHG8*, *SNHG10*, *SNHG12*, *Tsix* and *Tug1*.

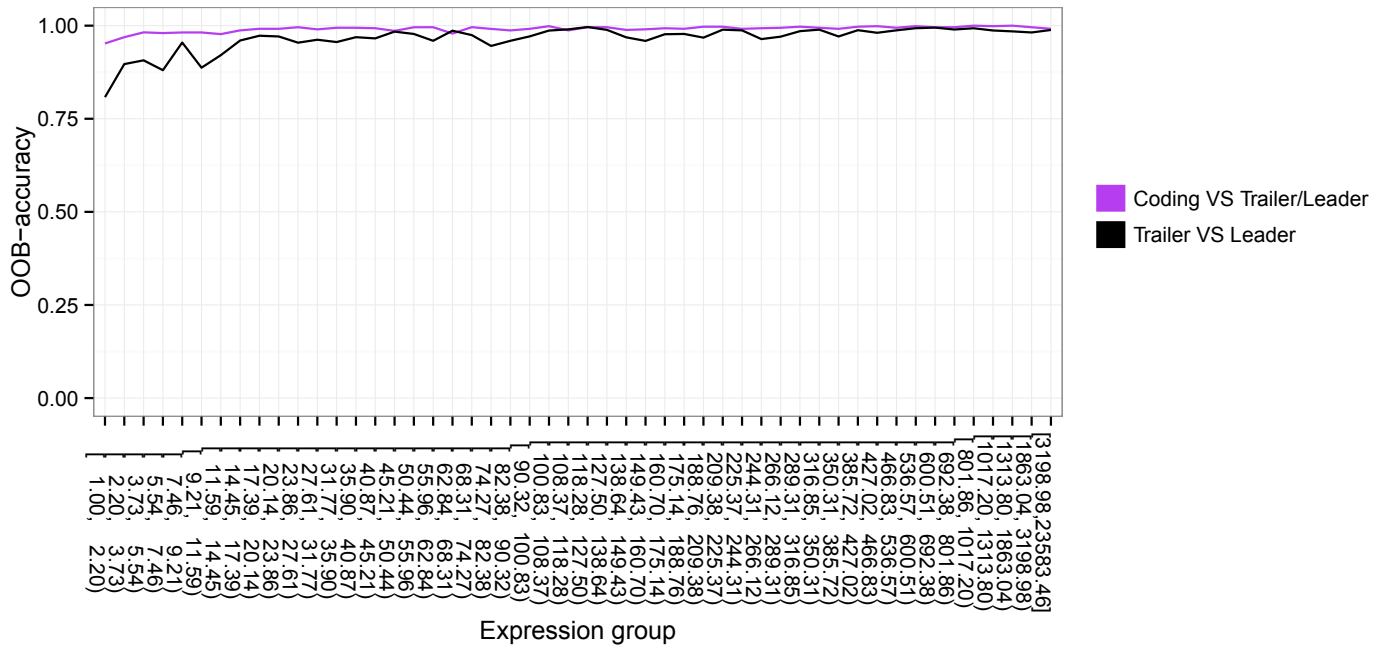

**Fig. S6. Accuracy of TOC as a function of expression.** Accuracy of TOC as a function of expression when classifying CDSs versus ORFs within trailers and leaders (purple), and when classifying ORFs within trailers versus ORFs within leaders (black). Accuracy was calculated as the fraction of correct predictions divided by all out-of-bag (OOB) predictions at a given expression level.

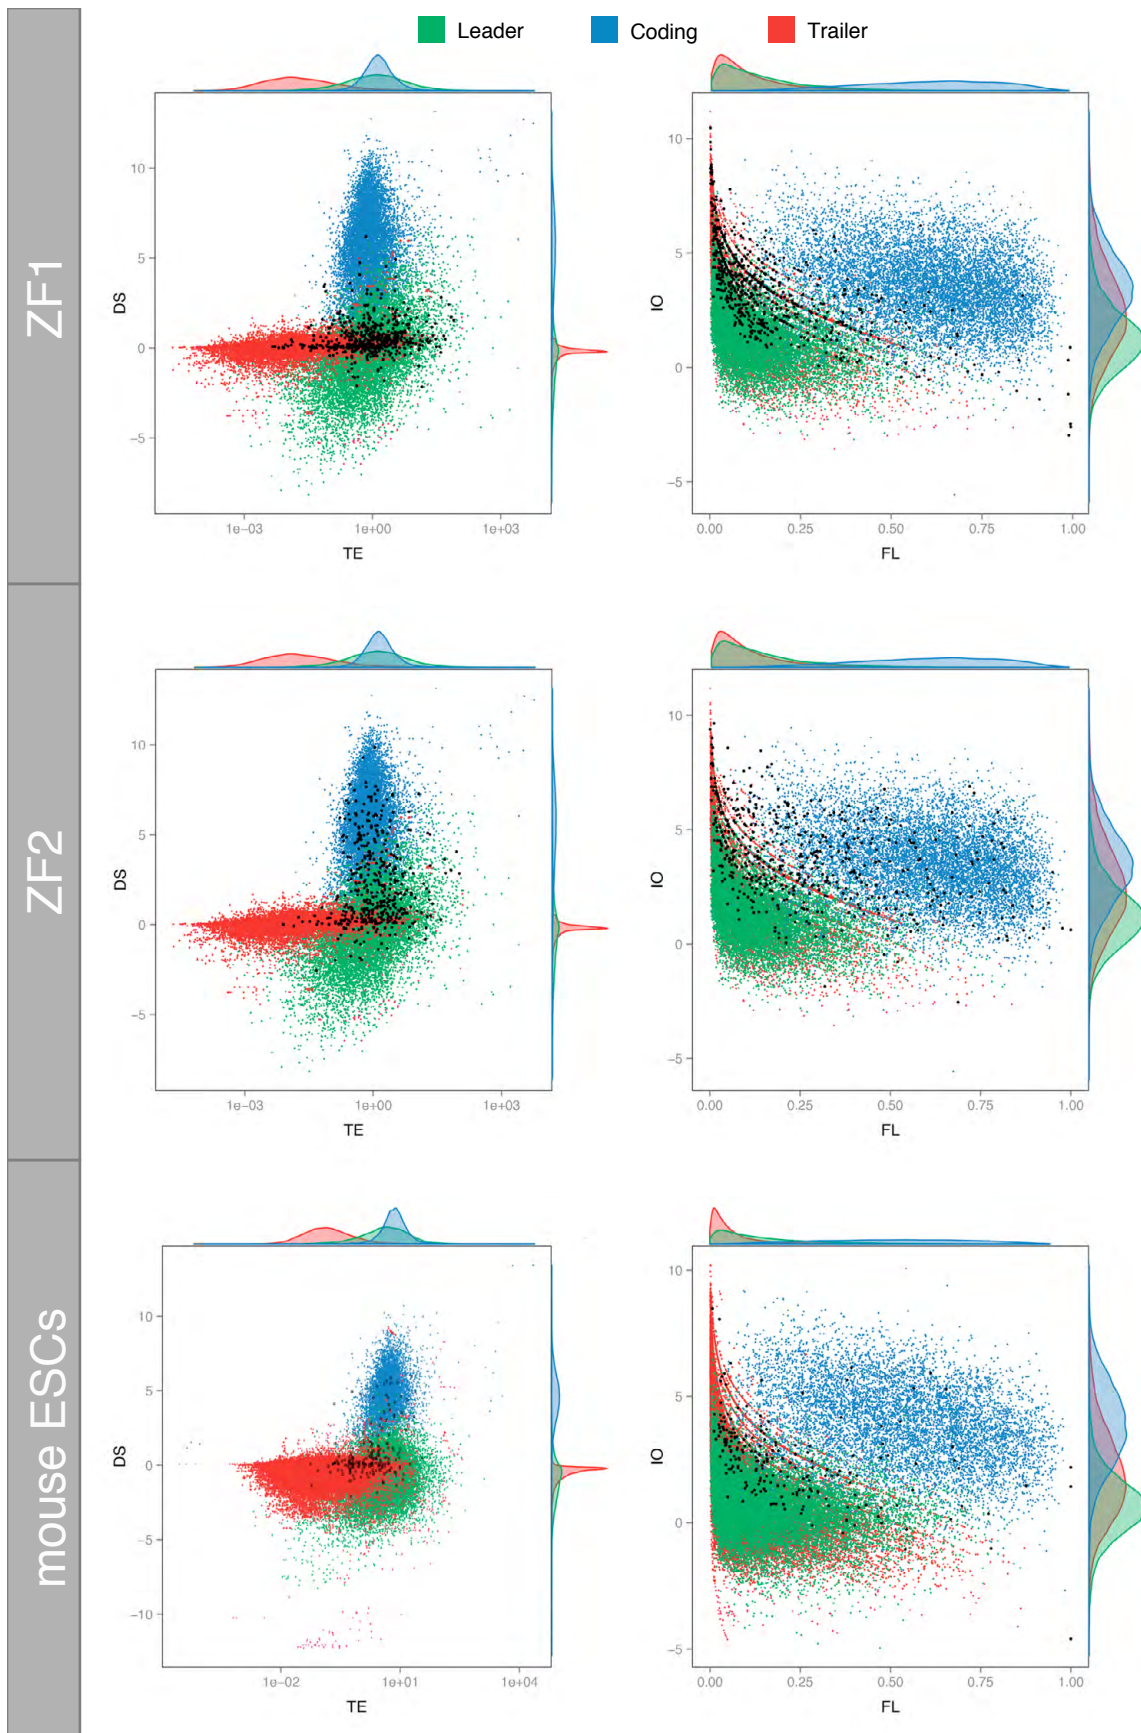

**Fig. S7. TOC-based classification of lncRNAs in zebrafish and mouse.** TOC was used to classify ORFs in previously proposed zebrafish and mouse lncRNA sets [ZF1: (Pauli et al., 2012); ZF2: (Ulitsky et al., 2011); mouse ESCs: (Guttman et al., 2011)]. ORFs of lncRNAs (black) are plotted on top of ORFs of the respective zebrafish or mouse RefSeq training sets (blue: CDS; green: ORFs of 5' leaders; red: ORFs of 3' trailers). The ORF with the most bases covered by RPFs was used to represent each lncRNA. lncRNAs without any RPFs are not shown in this figure. See Fig. 3 for explanation of the four metrics.v

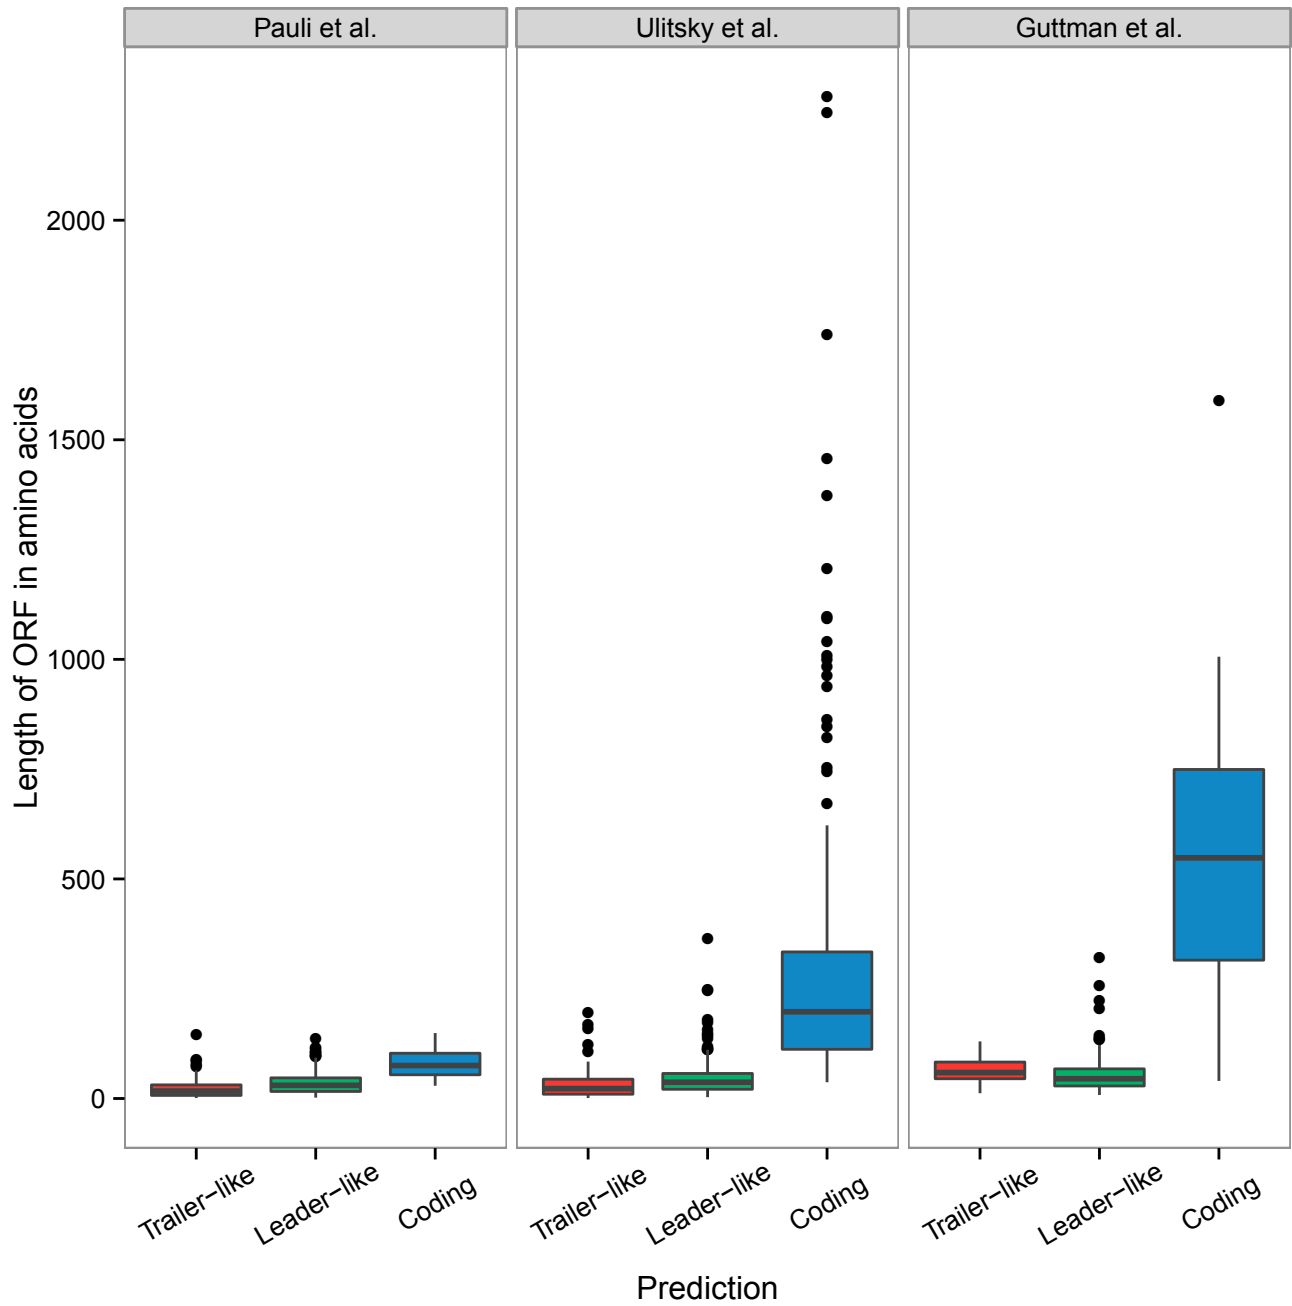

**Fig. S8. Length of ORFs subdivided by TOC-based classification across three sets of lncRNAs.** Coding ORFs are significantly longer than trailer-like and leader-like ORFs. The boxes denote the first, second (median) and third quartiles. The whiskers denote 1.5 \* inter-quartile range.



**Table S1. Oligonucleotide sequences**

|                                                                                                                 |                                         |
|-----------------------------------------------------------------------------------------------------------------|-----------------------------------------|
| <b>5'-adenylated, 3' dideoxy-C Linker-1 for linker-ligation</b>                                                 |                                         |
| /5rApp/CTGTAGGCACCATCAAT/3ddC/                                                                                  |                                         |
| <b>5' biotinylated DNA oligos (RNase-free PAGE purified) for rRNA depletion</b>                                 |                                         |
| 100 µM in 10 mM Tris pH 7.4 in the following proportions:                                                       |                                         |
| 23.29 µl                                                                                                        | /5Biosg/GGCGACCCTCAGACAGGCGTGGCCCCGGGAT |
| 30.29 µl                                                                                                        | /5Biosg/GCGGCCCTCCGTACGCCACAGGTCCCTC    |
| 14.33 µl                                                                                                        | /5Biosg/TCTGATAAATGCACGCGTCCCCGGGT      |
| 14.33 µl                                                                                                        | /5Biosg/CCCCGCCTCACCGGGTAAGTGAGGAAACGA  |
| 3.20 µl                                                                                                         | /5Biosg/TGGTTTCCCGCAACGCTGCCCGGCGGGTCAT |
| 5.35 µl                                                                                                         | /5Biosg/AATCAGGTCGTCTACGAGTCATTTA       |
| 4.09 µl                                                                                                         | /5Biosg/TCCTAGCTGGGGTATTCAATGGGGCGC     |
| 2.84 µl                                                                                                         | /5Biosg/TCCCGGTTACCCGGGGCCTATCGGAGATCCG |
| 0.57 µl                                                                                                         | /5Biosg/CCCCACCCCCCGCACGGCCCCGGGGCGCTT  |
| 1.71 µl                                                                                                         | /5Biosg/AGCCTCCATCAGAAGGACTTTGGCCCCC    |
| in 100 µl of sub-hyb mix. 1 µl of mix used in 30 µl total volume of subtractive hybridization reaction          |                                         |
| <b>5'-phosphorylated (for ssDNA circularization), internal spacer adapter primer with internal spacer:</b>      |                                         |
| /5Phos/GATCGGAAGAGCGTCGTGTAGGGAAAGAGTGTA/iSp18/CACTCA/iSp18/GTGACTGGAGTTCAGACGTGTGCTCTTCCGATCTATTGATGGTGCCTACAG |                                         |
| <b>Final library PCR forward and reverse primers:</b>                                                           |                                         |
| Forward:<br>AATGATACGGCGACCACCGAGATCTACACTCTTTCCCTACACGAC                                                       |                                         |
| Reverse:CAAGCAGAAGACGGCATACGAGATGTGACTGGAGTTCAGACGTGTGCTCTTCCGATC                                               |                                         |

**Table S2. TOC predictions for lncRNAs from Pauli et al.** TOC was used to classify proposed zebrafish lncRNAs from Pauli et al. (Pauli et al., 2012). Listed are the name of the locus (XLOC\_xxx), the transcript identifier and the RNA-seq based expression level in fragments per kilobase of exon per million fragments mapped (FPKM). For the most coding-like ORF (for predicted coding transcripts) or leader-like ORF (for predicted leader-like or trailer-like transcripts) within a transcript, the list shows the relative frequency of trees that classify that ORF as trailer, leader or coding. Note that this ORF may not necessarily be the longest or the most RPF-dense ORF within the locus. The last column contains the resulting TOC-based classification for the particular transcript. Transcript structures with all associated metadata (chromosome start/end, strand, locus name, isoform name, exon-intron structure) are accessible as GTF files at Gene Expression Omnibus (GEO) (accession number GSE46512).

|    | Locus       | Transcript   | FPKM       | Trailer | Leader | Coding | Prediction    |
|----|-------------|--------------|------------|---------|--------|--------|---------------|
| 1  | XLOC_014679 | Zv9_00018845 | 1.007536   | 0.984   | 0.016  |        | 0Trailer-like |
| 2  | XLOC_013998 | Zv9_00016369 | 1.015053   | 1       | 0      |        | 0Trailer-like |
| 3  | XLOC_010628 | Zv9_00056252 | 1.029703   | 1       | 0      |        | 0Trailer-like |
| 4  | XLOC_012087 | Zv9_00009587 | 1.0353688  | 1       | 0      |        | 0Trailer-like |
| 5  | XLOC_004030 | Zv9_00035237 | 1.0533204  | 0.906   | 0.094  |        | 0Trailer-like |
| 6  | XLOC_007108 | Zv9_00003780 | 1.0595292  | 1       | 0      |        | 0Trailer-like |
| 7  | XLOC_000239 | Zv9_00057831 | 1.0626     | 1       | 0      |        | 0Trailer-like |
| 8  | XLOC_011695 | Zv9_00008186 | 1.0681745  | 1       | 0      |        | 0Trailer-like |
| 9  | XLOC_000736 | Zv9_00001697 | 1.0763945  | 1       | 0      |        | 0Trailer-like |
| 10 | XLOC_004823 | Zv9_00038131 | 1.11711396 | 0.956   | 0.044  |        | 0Trailer-like |
| 11 | XLOC_015684 | Zv9_00022274 | 1.13672    | 1       | 0      |        | 0Trailer-like |
| 12 | XLOC_006009 | Zv9_00042745 | 1.140429   | 1       | 0      |        | 0Trailer-like |
| 13 | XLOC_001416 | Zv9_00025472 | 1.1427214  | 1       | 0      |        | 0Trailer-like |
| 14 | XLOC_014799 | Zv9_00019319 | 1.1500853  | 1       | 0      |        | 0Trailer-like |
| 15 | XLOC_015527 | Zv9_00021638 | 1.1548035  | 1       | 0      |        | 0Trailer-like |
| 16 | XLOC_000836 | Zv9_00002091 | 1.165835   | 1       | 0      |        | 0Trailer-like |
| 17 | XLOC_013594 | Zv9_00014890 | 1.1662876  | 1       | 0      |        | 0Trailer-like |
| 18 | XLOC_005489 | Zv9_00040838 | 1.1775514  | 1       | 0      |        | 0Trailer-like |
| 19 | XLOC_014410 | Zv9_00017979 | 1.177612   | 1       | 0      |        | 0Trailer-like |
| 20 | XLOC_010498 | Zv9_00055741 | 1.193375   | 1       | 0      |        | 0Trailer-like |
| 21 | XLOC_005336 | Zv9_00040241 | 1.1981899  | 0.678   | 0.322  |        | 0Trailer-like |
| 22 | XLOC_004837 | Zv9_00038185 | 1.2104329  | 1       | 0      |        | 0Trailer-like |
| 23 | XLOC_000140 | Zv9_00057549 | 1.211435   | 1       | 0      |        | 0Trailer-like |
| 24 | XLOC_007075 | Zv9_00003599 | 1.2236698  | 1       | 0      |        | 0Trailer-like |
| 25 | XLOC_004820 | Zv9_00038123 | 1.2305882  | 0.674   | 0.326  |        | 0Trailer-like |
| 26 | XLOC_009650 | Zv9_00052272 | 1.2321205  | 1       | 0      |        | 0Trailer-like |
| 27 | XLOC_005217 | Zv9_00039682 | 1.238463   | 1       | 0      |        | 0Trailer-like |
| 28 | XLOC_004972 | Zv9_00038706 | 1.24575123 | 0.554   | 0.446  |        | 0Trailer-like |
| 29 | XLOC_009606 | Zv9_00052160 | 1.2472086  | 0.784   | 0.176  | 0.04   | Trailer-like  |
| 30 | XLOC_012326 | Zv9_00010501 | 1.24817    | 1       | 0      |        | 0Trailer-like |
| 31 | XLOC_012735 | Zv9_00011802 | 1.2561448  | 1       | 0      |        | 0Trailer-like |
| 32 | XLOC_012037 | Zv9_00009390 | 1.2585519  | 1       | 0      |        | 0Trailer-like |
| 33 | XLOC_000797 | Zv9_00001944 | 1.26677    | 1       | 0      |        | 0Trailer-like |
| 34 | XLOC_002640 | Zv9_00030333 | 1.2744843  | 0.918   | 0.082  |        | 0Trailer-like |
| 35 | XLOC_015994 | Zv9_00023370 | 1.28552175 | 0.85    | 0.15   |        | 0Trailer-like |
| 36 | XLOC_007909 | Zv9_00046312 | 1.292573   | 1       | 0      |        | 0Trailer-like |
| 37 | XLOC_015843 | Zv9_00022866 | 1.2934247  | 1       | 0      |        | 0Trailer-like |

|    |             |              |            |       |       |                   |
|----|-------------|--------------|------------|-------|-------|-------------------|
| 38 | XLOC_011738 | Zv9_00008324 | 1.3132349  | 1     | 0     | 0Trailer-like     |
| 39 | XLOC_009531 | Zv9_00051915 | 1.3206916  | 0.746 | 0.254 | 0Trailer-like     |
| 40 | XLOC_010435 | Zv9_00055439 | 1.3285343  | 0.676 | 0.324 | 0Trailer-like     |
| 41 | XLOC_008974 | Zv9_00049966 | 1.3411061  | 1     | 0     | 0Trailer-like     |
| 42 | XLOC_007170 | Zv9_00004027 | 1.34262226 | 0.528 | 0.472 | 0Trailer-like     |
| 43 | XLOC_006727 | Zv9_00045002 | 1.348948   | 1     | 0     | 0Trailer-like     |
| 44 | XLOC_002022 | Zv9_00027768 | 1.35229    | 1     | 0     | 0Trailer-like     |
| 45 | XLOC_003956 | Zv9_00034940 | 1.354561   | 1     | 0     | 0Trailer-like     |
| 46 | XLOC_004175 | Zv9_00035749 | 1.359154   | 0.62  | 0.38  | 0Trailer-like     |
| 47 | XLOC_011717 | Zv9_00008265 | 1.3604523  | 0.748 | 0.252 | 0Trailer-like     |
| 48 | XLOC_006711 | Zv9_00044934 | 1.3645604  | 1     | 0     | 0Trailer-like     |
| 49 | XLOC_011805 | Zv9_00008556 | 1.373329   | 1     | 0     | 0Trailer-like     |
| 50 | XLOC_015117 | Zv9_00020233 | 1.4118045  | 1     | 0     | 0Trailer-like     |
| 51 | XLOC_010716 | Zv9_00056652 | 1.4398844  | 1     | 0     | 0Trailer-like     |
| 52 | XLOC_015367 | Zv9_00021157 | 1.4415364  | 1     | 0     | 0Trailer-like     |
| 53 | XLOC_000026 | Zv9_00058275 | 1.4511349  | 0.532 | 0.358 | 0.11Trailer-like  |
| 54 | XLOC_012296 | Zv9_00010387 | 1.48856501 | 0.752 | 0.234 | 0.014Trailer-like |
| 55 | XLOC_007064 | Zv9_00003550 | 1.4998208  | 0.774 | 0.226 | 0Trailer-like     |
| 56 | XLOC_002219 | Zv9_00028592 | 1.5079514  | 0.978 | 0.022 | 0Trailer-like     |
| 57 | XLOC_015669 | Zv9_00022227 | 1.5214832  | 0.536 | 0.464 | 0Trailer-like     |
| 58 | XLOC_014772 | Zv9_00019203 | 1.5272688  | 1     | 0     | 0Trailer-like     |
| 59 | XLOC_013118 | Zv9_00013210 | 1.5344495  | 1     | 0     | 0Trailer-like     |
| 60 | XLOC_005185 | Zv9_00039585 | 1.5449469  | 0.596 | 0.402 | 0.002Trailer-like |
| 61 | XLOC_004308 | Zv9_00036173 | 1.553124   | 1     | 0     | 0Trailer-like     |
| 62 | XLOC_013794 | Zv9_00015673 | 1.56184159 | 0.548 | 0.358 | 0.094Trailer-like |
| 63 | XLOC_011940 | Zv9_00008796 | 1.59537904 | 1     | 0     | 0Trailer-like     |
| 64 | XLOC_001023 | Zv9_00024017 | 1.597621   | 0.968 | 0.032 | 0Trailer-like     |
| 65 | XLOC_001772 | Zv9_00026769 | 1.60616177 | 1     | 0     | 0Trailer-like     |
| 66 | XLOC_001622 | Zv9_00026216 | 1.609382   | 1     | 0     | 0Trailer-like     |
| 67 | XLOC_002837 | Zv9_00030999 | 1.6172855  | 1     | 0     | 0Trailer-like     |
| 68 | XLOC_014209 | Zv9_00017193 | 1.6517659  | 0.968 | 0.032 | 0Trailer-like     |
| 69 | XLOC_009712 | Zv9_00052538 | 1.6738462  | 0.82  | 0.18  | 0Trailer-like     |
| 70 | XLOC_015158 | Zv9_00020419 | 1.6742653  | 1     | 0     | 0Trailer-like     |
| 71 | XLOC_007928 | Zv9_00046393 | 1.6868635  | 1     | 0     | 0Trailer-like     |
| 72 | XLOC_009653 | Zv9_00052276 | 1.6869573  | 0.892 | 0.108 | 0Trailer-like     |
| 73 | XLOC_002113 | Zv9_00028216 | 1.70068171 | 1     | 0     | 0Trailer-like     |
| 74 | XLOC_014101 | Zv9_00016768 | 1.740575   | 1     | 0     | 0Trailer-like     |
| 75 | XLOC_004037 | Zv9_00035274 | 1.7669895  | 1     | 0     | 0Trailer-like     |
| 76 | XLOC_011844 | Zv9_00008640 | 1.7901682  | 1     | 0     | 0Trailer-like     |
| 77 | XLOC_002623 | Zv9_00030263 | 1.791754   | 0.7   | 0.3   | 0Trailer-like     |
| 78 | XLOC_010359 | Zv9_00055121 | 1.8025996  | 0.774 | 0.226 | 0Trailer-like     |
| 79 | XLOC_000323 | Zv9_00000198 | 1.84177461 | 0.756 | 0.228 | 0.016Trailer-like |
| 80 | XLOC_012245 | Zv9_00010057 | 1.8453813  | 0.862 | 0.138 | 0Trailer-like     |
| 81 | XLOC_008133 | Zv9_00046997 | 1.8745471  | 1     | 0     | 0Trailer-like     |
| 82 | XLOC_012273 | Zv9_00010272 | 1.89615158 | 1     | 0     | 0Trailer-like     |
| 83 | XLOC_013102 | Zv9_00013149 | 1.92401123 | 0.808 | 0.178 | 0.014Trailer-like |
| 84 | XLOC_011612 | Zv9_00007852 | 1.9414082  | 1     | 0     | 0Trailer-like     |
| 85 | XLOC_014776 | Zv9_00019217 | 1.95246842 | 1     | 0     | 0Trailer-like     |
| 86 | XLOC_003442 | Zv9_00033173 | 1.953506   | 1     | 0     | 0Trailer-like     |
| 87 | XLOC_003818 | Zv9_00034511 | 1.9557562  | 1     | 0     | 0Trailer-like     |
| 88 | XLOC_008946 | Zv9_00049871 | 1.9693442  | 1     | 0     | 0Trailer-like     |
| 89 | XLOC_001717 | Zv9_00026528 | 1.9713826  | 1     | 0     | 0Trailer-like     |
| 90 | XLOC_002409 | Zv9_00029450 | 2.000364   | 0.94  | 0.06  | 0Trailer-like     |
| 91 | XLOC_004276 | Zv9_00036047 | 2.04382126 | 0.958 | 0.042 | 0Trailer-like     |
| 92 | XLOC_008923 | Zv9_00049790 | 2.05251    | 1     | 0     | 0Trailer-like     |

|     |             |              |            |       |       |                   |
|-----|-------------|--------------|------------|-------|-------|-------------------|
| 93  | XLOC_002559 | Zv9_00029985 | 2.06899    | 1     | 0     | 0Trailer-like     |
| 94  | XLOC_009582 | Zv9_00052099 | 2.0734445  | 0.564 | 0.436 | 0Trailer-like     |
| 95  | XLOC_010181 | Zv9_00054442 | 2.1035511  | 1     | 0     | 0Trailer-like     |
| 96  | XLOC_002407 | Zv9_00029445 | 2.1199078  | 1     | 0     | 0Trailer-like     |
| 97  | XLOC_009770 | Zv9_00052769 | 2.13654367 | 1     | 0     | 0Trailer-like     |
| 98  | XLOC_015901 | Zv9_00023067 | 2.1961622  | 0.708 | 0.29  | 0.002Trailer-like |
| 99  | XLOC_012289 | Zv9_00010362 | 2.2127285  | 1     | 0     | 0Trailer-like     |
| 100 | XLOC_012846 | Zv9_00012300 | 2.22318328 | 1     | 0     | 0Trailer-like     |
| 101 | XLOC_009989 | Zv9_00053593 | 2.250111   | 1     | 0     | 0Trailer-like     |
| 102 | XLOC_001864 | Zv9_00027123 | 2.2590134  | 1     | 0     | 0Trailer-like     |
| 103 | XLOC_007917 | Zv9_00046349 | 2.2657439  | 0.842 | 0.132 | 0.026Trailer-like |
| 104 | XLOC_011792 | Zv9_00008517 | 2.2739188  | 0.64  | 0.358 | 0.002Trailer-like |
| 105 | XLOC_003366 | Zv9_00032941 | 2.2851039  | 0.498 | 0.488 | 0.014Trailer-like |
| 106 | XLOC_005899 | Zv9_00042432 | 2.302946   | 0.862 | 0.136 | 0.002Trailer-like |
| 107 | XLOC_006994 | Zv9_00003315 | 2.341606   | 0.562 | 0.438 | 0Trailer-like     |
| 108 | XLOC_001365 | Zv9_00025266 | 2.3429614  | 1     | 0     | 0Trailer-like     |
| 109 | XLOC_002575 | Zv9_00030066 | 2.34487088 | 0.878 | 0.122 | 0Trailer-like     |
| 110 | XLOC_012312 | Zv9_00010460 | 2.34902    | 1     | 0     | 0Trailer-like     |
| 111 | XLOC_011158 | Zv9_00006213 | 2.34985    | 1     | 0     | 0Trailer-like     |
| 112 | XLOC_012791 | Zv9_00012059 | 2.35141027 | 1     | 0     | 0Trailer-like     |
| 113 | XLOC_007661 | Zv9_00045551 | 2.374607   | 1     | 0     | 0Trailer-like     |
| 114 | XLOC_002497 | Zv9_00029721 | 2.3970064  | 1     | 0     | 0Trailer-like     |
| 115 | XLOC_008264 | Zv9_00047425 | 2.465567   | 1     | 0     | 0Trailer-like     |
| 116 | XLOC_010081 | Zv9_00053986 | 2.4691132  | 0.572 | 0.42  | 0.008Trailer-like |
| 117 | XLOC_012264 | Zv9_00010180 | 2.558463   | 1     | 0     | 0Trailer-like     |
| 118 | XLOC_004867 | Zv9_00038276 | 2.5877743  | 1     | 0     | 0Trailer-like     |
| 119 | XLOC_007655 | Zv9_00045542 | 2.5960522  | 0.524 | 0.476 | 0Trailer-like     |
| 120 | XLOC_015536 | Zv9_00021695 | 2.62818696 | 0.968 | 0.032 | 0Trailer-like     |
| 121 | XLOC_015538 | Zv9_00021709 | 2.6342902  | 1     | 0     | 0Trailer-like     |
| 122 | XLOC_010197 | Zv9_00054513 | 2.639227   | 0.642 | 0.358 | 0Trailer-like     |
| 123 | XLOC_000014 | Zv9_00058418 | 2.693553   | 0.644 | 0.356 | 0Trailer-like     |
| 124 | XLOC_014771 | Zv9_00019201 | 2.706089   | 1     | 0     | 0Trailer-like     |
| 125 | XLOC_014250 | Zv9_00017338 | 2.7206458  | 1     | 0     | 0Trailer-like     |
| 126 | XLOC_014259 | Zv9_00017368 | 2.7229457  | 1     | 0     | 0Trailer-like     |
| 127 | XLOC_000050 | Zv9_00058518 | 2.730212   | 0.594 | 0.406 | 0Trailer-like     |
| 128 | XLOC_012242 | Zv9_00010036 | 2.73922365 | 0.996 | 0.004 | 0Trailer-like     |
| 129 | XLOC_010911 | Zv9_00005311 | 2.821442   | 1     | 0     | 0Trailer-like     |
| 130 | XLOC_008881 | Zv9_00049571 | 2.8561211  | 1     | 0     | 0Trailer-like     |
| 131 | XLOC_015361 | Zv9_00021150 | 2.932951   | 1     | 0     | 0Trailer-like     |
| 132 | XLOC_007870 | Zv9_00046174 | 2.97775833 | 0.97  | 0.03  | 0Trailer-like     |
| 133 | XLOC_007373 | Zv9_00004656 | 2.9988947  | 0.942 | 0.058 | 0Trailer-like     |
| 134 | XLOC_005797 | Zv9_00042018 | 3.0691106  | 1     | 0     | 0Trailer-like     |
| 135 | XLOC_015103 | Zv9_00020187 | 3.12002201 | 0.874 | 0.124 | 0.002Trailer-like |
| 136 | XLOC_009451 | Zv9_00051620 | 3.13524477 | 1     | 0     | 0Trailer-like     |
| 137 | XLOC_007082 | Zv9_00003645 | 3.148196   | 0.824 | 0.176 | 0Trailer-like     |
| 138 | XLOC_007512 | Zv9_00005180 | 3.157358   | 0.812 | 0.188 | 0Trailer-like     |
| 139 | XLOC_003391 | Zv9_00033021 | 3.1603877  | 0.938 | 0.062 | 0Trailer-like     |
| 140 | XLOC_013976 | Zv9_00016342 | 3.189407   | 1     | 0     | 0Trailer-like     |
| 141 | XLOC_013751 | Zv9_00015488 | 3.2346992  | 1     | 0     | 0Trailer-like     |
| 142 | XLOC_014777 | Zv9_00019219 | 3.24823297 | 1     | 0     | 0Trailer-like     |
| 143 | XLOC_014756 | Zv9_00019140 | 3.2818944  | 0.812 | 0.188 | 0Trailer-like     |
| 144 | XLOC_012806 | Zv9_00012116 | 3.380097   | 1     | 0     | 0Trailer-like     |
| 145 | XLOC_006993 | Zv9_00003314 | 3.43742039 | 0.65  | 0.35  | 0Trailer-like     |
| 146 | XLOC_011998 | Zv9_00009213 | 3.457186   | 1     | 0     | 0Trailer-like     |
| 147 | XLOC_001472 | Zv9_00025648 | 3.653908   | 1     | 0     | 0Trailer-like     |

|     |             |              |            |       |       |                   |
|-----|-------------|--------------|------------|-------|-------|-------------------|
| 148 | XLOC_006062 | Zv9_00042938 | 3.659168   | 1     | 0     | 0Trailer-like     |
| 149 | XLOC_003436 | Zv9_00033168 | 3.695989   | 1     | 0     | 0Trailer-like     |
| 150 | XLOC_013284 | Zv9_00013748 | 3.697597   | 1     | 0     | 0Trailer-like     |
| 151 | XLOC_013169 | Zv9_00013344 | 3.732943   | 0.916 | 0.084 | 0Trailer-like     |
| 152 | XLOC_014684 | Zv9_00018867 | 3.7332481  | 1     | 0     | 0Trailer-like     |
| 153 | XLOC_004038 | Zv9_00035276 | 3.747982   | 1     | 0     | 0Trailer-like     |
| 154 | XLOC_011171 | Zv9_00006267 | 3.7643594  | 1     | 0     | 0Trailer-like     |
| 155 | XLOC_013684 | Zv9_00015227 | 3.82495607 | 1     | 0     | 0Trailer-like     |
| 156 | XLOC_005512 | Zv9_00040930 | 3.83917    | 1     | 0     | 0Trailer-like     |
| 157 | XLOC_014850 | Zv9_00019492 | 3.8693372  | 0.828 | 0.172 | 0Trailer-like     |
| 158 | XLOC_010418 | Zv9_00055360 | 3.9415159  | 1     | 0     | 0Trailer-like     |
| 159 | XLOC_010664 | Zv9_00056404 | 3.9692418  | 0.954 | 0.046 | 0Trailer-like     |
| 160 | XLOC_003912 | Zv9_00034771 | 4.0027732  | 0.772 | 0.228 | 0Trailer-like     |
| 161 | XLOC_015423 | Zv9_00021301 | 4.008935   | 1     | 0     | 0Trailer-like     |
| 162 | XLOC_011475 | Zv9_00007410 | 4.0094885  | 1     | 0     | 0Trailer-like     |
| 163 | XLOC_013084 | Zv9_00013076 | 4.037135   | 1     | 0     | 0Trailer-like     |
| 164 | XLOC_001133 | Zv9_00024401 | 4.0878622  | 0.882 | 0.118 | 0Trailer-like     |
| 165 | XLOC_012324 | Zv9_00010492 | 4.102043   | 1     | 0     | 0Trailer-like     |
| 166 | XLOC_009782 | Zv9_00052809 | 4.1552094  | 0.888 | 0.11  | 0.002Trailer-like |
| 167 | XLOC_001799 | Zv9_00026890 | 4.4102014  | 0.824 | 0.1   | 0.076Trailer-like |
| 168 | XLOC_002890 | Zv9_00031197 | 4.449279   | 1     | 0     | 0Trailer-like     |
| 169 | XLOC_004373 | Zv9_00036501 | 4.5808644  | 1     | 0     | 0Trailer-like     |
| 170 | XLOC_013585 | Zv9_00014860 | 4.724115   | 0.874 | 0.114 | 0.012Trailer-like |
| 171 | XLOC_002627 | Zv9_00030283 | 4.7903063  | 0.996 | 0.004 | 0Trailer-like     |
| 172 | XLOC_002753 | Zv9_00030750 | 4.8000877  | 0.988 | 0.012 | 0Trailer-like     |
| 173 | XLOC_011407 | Zv9_00007165 | 5.0049623  | 1     | 0     | 0Trailer-like     |
| 174 | XLOC_015776 | Zv9_00022596 | 5.24286601 | 1     | 0     | 0Trailer-like     |
| 175 | XLOC_003453 | Zv9_00033223 | 5.246651   | 0.954 | 0.046 | 0Trailer-like     |
| 176 | XLOC_003542 | Zv9_00033512 | 5.46952416 | 0.686 | 0.314 | 0Trailer-like     |
| 177 | XLOC_004593 | Zv9_00037307 | 5.5434412  | 0.772 | 0.228 | 0Trailer-like     |
| 178 | XLOC_005175 | Zv9_00039541 | 5.746612   | 1     | 0     | 0Trailer-like     |
| 179 | XLOC_012722 | Zv9_00011730 | 5.769935   | 0.522 | 0.46  | 0.018Trailer-like |
| 180 | XLOC_010115 | Zv9_00054098 | 5.884813   | 1     | 0     | 0Trailer-like     |
| 181 | XLOC_011053 | Zv9_00005827 | 5.9075263  | 1     | 0     | 0Trailer-like     |
| 182 | XLOC_001356 | Zv9_00025199 | 6.1219911  | 0.578 | 0.388 | 0.034Trailer-like |
| 183 | XLOC_007764 | Zv9_00045867 | 6.195856   | 0.9   | 0.1   | 0Trailer-like     |
| 184 | XLOC_012244 | Zv9_00010056 | 6.201548   | 1     | 0     | 0Trailer-like     |
| 185 | XLOC_012588 | Zv9_00011317 | 6.206141   | 1     | 0     | 0Trailer-like     |
| 186 | XLOC_000238 | Zv9_00058248 | 6.409572   | 0.962 | 0.038 | 0Trailer-like     |
| 187 | XLOC_009382 | Zv9_00051260 | 6.45301    | 0.75  | 0.206 | 0.044Trailer-like |
| 188 | XLOC_012472 | Zv9_00010983 | 6.5478745  | 0.964 | 0.036 | 0Trailer-like     |
| 189 | XLOC_004742 | Zv9_00037833 | 6.586833   | 1     | 0     | 0Trailer-like     |
| 190 | XLOC_011952 | Zv9_00008901 | 7.09024    | 1     | 0     | 0Trailer-like     |
| 191 | XLOC_012274 | Zv9_00010277 | 7.0963364  | 0.898 | 0.102 | 0Trailer-like     |
| 192 | XLOC_012451 | Zv9_00010912 | 7.42036    | 1     | 0     | 0Trailer-like     |
| 193 | XLOC_004843 | Zv9_00038203 | 7.6028841  | 0.942 | 0.058 | 0Trailer-like     |
| 194 | XLOC_007747 | Zv9_00045827 | 7.91723    | 1     | 0     | 0Trailer-like     |
| 195 | XLOC_015315 | Zv9_00021018 | 7.9516494  | 1     | 0     | 0Trailer-like     |
| 196 | XLOC_014384 | Zv9_00017882 | 8.032252   | 0.58  | 0.412 | 0.008Trailer-like |
| 197 | XLOC_004029 | Zv9_00035225 | 8.544242   | 1     | 0     | 0Trailer-like     |
| 198 | XLOC_016110 | Zv9_00023747 | 8.6720594  | 1     | 0     | 0Trailer-like     |
| 199 | XLOC_014528 | Zv9_00018303 | 9.1369851  | 0.892 | 0.108 | 0Trailer-like     |
| 200 | XLOC_003846 | Zv9_00034594 | 9.2826982  | 0.81  | 0.19  | 0Trailer-like     |
| 201 | XLOC_012260 | Zv9_00010124 | 9.4377401  | 0.85  | 0.13  | 0.02Trailer-like  |
| 202 | XLOC_007442 | Zv9_00004900 | 9.616672   | 0.782 | 0.196 | 0.022Trailer-like |

|     |             |              |             |       |       |                   |
|-----|-------------|--------------|-------------|-------|-------|-------------------|
| 203 | XLOC_008536 | Zv9_00048327 | 9.6598277   | 1     | 0     | 0Trailer-like     |
| 204 | XLOC_008332 | Zv9_00047750 | 9.770221    | 0.964 | 0.032 | 0.004Trailer-like |
| 205 | XLOC_012474 | Zv9_00010988 | 10.156961   | 0.732 | 0.238 | 0.03Trailer-like  |
| 206 | XLOC_008891 | Zv9_00049609 | 10.1606577  | 1     | 0     | 0Trailer-like     |
| 207 | XLOC_008878 | Zv9_00049563 | 10.2236269  | 1     | 0     | 0Trailer-like     |
| 208 | XLOC_001566 | Zv9_00025990 | 10.246189   | 1     | 0     | 0Trailer-like     |
| 209 | XLOC_001761 | Zv9_00026715 | 10.8615654  | 0.92  | 0.08  | 0Trailer-like     |
| 210 | XLOC_003743 | Zv9_00034191 | 10.956571   | 1     | 0     | 0Trailer-like     |
| 211 | XLOC_004315 | Zv9_00036211 | 11.05256    | 0.656 | 0.152 | 0.192Trailer-like |
| 212 | XLOC_003778 | Zv9_00034315 | 11.188248   | 1     | 0     | 0Trailer-like     |
| 213 | XLOC_009935 | Zv9_00053361 | 11.485778   | 1     | 0     | 0Trailer-like     |
| 214 | XLOC_004522 | Zv9_00037065 | 13.0916098  | 0.636 | 0.364 | 0Trailer-like     |
| 215 | XLOC_013338 | Zv9_00013995 | 13.46096    | 1     | 0     | 0Trailer-like     |
| 216 | XLOC_001437 | Zv9_00025545 | 13.636503   | 1     | 0     | 0Trailer-like     |
| 217 | XLOC_014738 | Zv9_00019078 | 14.2944211  | 1     | 0     | 0Trailer-like     |
| 218 | XLOC_011951 | Zv9_00008864 | 14.332881   | 1     | 0     | 0Trailer-like     |
| 219 | XLOC_001842 | Zv9_00027058 | 15.714357   | 1     | 0     | 0Trailer-like     |
| 220 | XLOC_011231 | Zv9_00006444 | 16.414416   | 0.888 | 0.108 | 0.004Trailer-like |
| 221 | XLOC_003301 | Zv9_00032709 | 16.5687     | 1     | 0     | 0Trailer-like     |
| 222 | XLOC_001053 | Zv9_00024127 | 16.9262964  | 1     | 0     | 0Trailer-like     |
| 223 | XLOC_003748 | Zv9_00034198 | 17.7100052  | 1     | 0     | 0Trailer-like     |
| 224 | XLOC_014737 | Zv9_00019077 | 17.96532    | 0.994 | 0.006 | 0Trailer-like     |
| 225 | XLOC_012290 | Zv9_00010363 | 18.31792532 | 1     | 0     | 0Trailer-like     |
| 226 | XLOC_009204 | Zv9_00050673 | 20.11012    | 1     | 0     | 0Trailer-like     |
| 227 | XLOC_012197 | Zv9_00009870 | 20.19149    | 0.86  | 0.14  | 0Trailer-like     |
| 228 | XLOC_014270 | Zv9_00017393 | 20.2331161  | 0.592 | 0.408 | 0Trailer-like     |
| 229 | XLOC_003813 | Zv9_00034478 | 20.842376   | 1     | 0     | 0Trailer-like     |
| 230 | XLOC_012129 | Zv9_00009710 | 21.163132   | 0.994 | 0.006 | 0Trailer-like     |
| 231 | XLOC_001801 | Zv9_00026898 | 21.778514   | 1     | 0     | 0Trailer-like     |
| 232 | XLOC_003682 | Zv9_00033972 | 23.312479   | 1     | 0     | 0Trailer-like     |
| 233 | XLOC_004050 | Zv9_00035331 | 25.394844   | 1     | 0     | 0Trailer-like     |
| 234 | XLOC_013753 | Zv9_00015491 | 27.765557   | 1     | 0     | 0Trailer-like     |
| 235 | XLOC_009688 | Zv9_00052425 | 27.787386   | 1     | 0     | 0Trailer-like     |
| 236 | XLOC_007369 | Zv9_00004647 | 27.822115   | 1     | 0     | 0Trailer-like     |
| 237 | XLOC_001653 | Zv9_00026333 | 28.671688   | 1     | 0     | 0Trailer-like     |
| 238 | XLOC_001094 | Zv9_00024272 | 29.48762    | 1     | 0     | 0Trailer-like     |
| 239 | XLOC_011650 | Zv9_00007990 | 29.5100322  | 1     | 0     | 0Trailer-like     |
| 240 | XLOC_006107 | Zv9_00043135 | 31.979294   | 1     | 0     | 0Trailer-like     |
| 241 | XLOC_004705 | Zv9_00037691 | 32.783192   | 0.972 | 0.008 | 0.02Trailer-like  |
| 242 | XLOC_003753 | Zv9_00034218 | 33.15648    | 1     | 0     | 0Trailer-like     |
| 243 | XLOC_001321 | Zv9_00025064 | 35.03069697 | 1     | 0     | 0Trailer-like     |
| 244 | XLOC_012308 | Zv9_00010436 | 38.8006062  | 1     | 0     | 0Trailer-like     |
| 245 | XLOC_005167 | Zv9_00039513 | 39.2286     | 1     | 0     | 0Trailer-like     |
| 246 | XLOC_011970 | Zv9_00009078 | 40.0801941  | 0.998 | 0.002 | 0Trailer-like     |
| 247 | XLOC_000064 | Zv9_00058043 | 41.29443    | 0.856 | 0.114 | 0.03Trailer-like  |
| 248 | XLOC_012734 | Zv9_00011799 | 42.166888   | 1     | 0     | 0Trailer-like     |
| 249 | XLOC_009705 | Zv9_00052508 | 42.63646    | 0.99  | 0.01  | 0Trailer-like     |
| 250 | XLOC_004366 | Zv9_00036459 | 45.4008598  | 0.406 | 0.294 | 0.3Trailer-like   |
| 251 | XLOC_013686 | Zv9_00015229 | 58.30274    | 1     | 0     | 0Trailer-like     |
| 252 | XLOC_015157 | Zv9_00020417 | 60.237864   | 1     | 0     | 0Trailer-like     |
| 253 | XLOC_011285 | Zv9_00006671 | 61.99122    | 1     | 0     | 0Trailer-like     |
| 254 | XLOC_011310 | Zv9_00006785 | 68.6309     | 0.996 | 0.004 | 0Trailer-like     |
| 255 | XLOC_006423 | Zv9_00044103 | 74.40678    | 1     | 0     | 0Trailer-like     |
| 256 | XLOC_015546 | Zv9_00021734 | 75.31762    | 1     | 0     | 0Trailer-like     |
| 257 | XLOC_010379 | Zv9_00055192 | 87.836249   | 1     | 0     | 0Trailer-like     |

|     |             |              |             |       |       |                   |
|-----|-------------|--------------|-------------|-------|-------|-------------------|
| 258 | XLOC_000030 | Zv9_00057945 | 117.975864  | 1     | 0     | 0Trailer-like     |
| 259 | XLOC_011957 | Zv9_00008961 | 125.308656  | 1     | 0     | 0Trailer-like     |
| 260 | XLOC_005088 | Zv9_00039234 | 139.5556    | 0.484 | 0.396 | 0.12Trailer-like  |
| 261 | XLOC_012254 | Zv9_00010108 | 161.14748   | 0.992 | 0.008 | 0Trailer-like     |
| 262 | XLOC_006045 | Zv9_00042863 | 163.6178    | 0.894 | 0.102 | 0.004Trailer-like |
| 263 | XLOC_015787 | Zv9_00022624 | 164.42657   | 0.666 | 0.15  | 0.184Trailer-like |
| 264 | XLOC_011955 | Zv9_00008933 | 167.938586  | 0.996 | 0.004 | 0Trailer-like     |
| 265 | XLOC_014378 | Zv9_00017842 | 184.1334251 | 1     | 0     | 0Trailer-like     |
| 266 | XLOC_007772 | Zv9_00045895 | 197.501462  | 0.996 | 0.002 | 0.002Trailer-like |
| 267 | XLOC_013349 | Zv9_00014063 | 321.1174    | 0.836 | 0.122 | 0.042Trailer-like |
| 268 | XLOC_015146 | Zv9_00020371 | 355.892082  | 1     | 0     | 0Trailer-like     |
| 269 | XLOC_010625 | Zv9_00056238 | 395.442629  | 0.532 | 0.252 | 0.216Trailer-like |
| 270 | XLOC_001541 | Zv9_00025887 | 411.017     | 0.828 | 0.168 | 0.004Trailer-like |
| 271 | XLOC_003456 | Zv9_00033229 | 584.4842    | 0.63  | 0.332 | 0.038Trailer-like |
| 272 | XLOC_000901 | Zv9_00002264 | 1.027113    | 0.024 | 0.962 | 0.014Leader-like  |
| 273 | XLOC_015074 | Zv9_00020119 | 1.0349569   | 0.122 | 0.878 | 0Leader-like      |
| 274 | XLOC_000661 | Zv9_00001432 | 1.03579388  | 0.082 | 0.918 | 0Leader-like      |
| 275 | XLOC_003838 | Zv9_00034573 | 1.0600469   | 0     | 1     | 0Leader-like      |
| 276 | XLOC_014302 | Zv9_00017522 | 1.0626247   | 0.164 | 0.712 | 0.124Leader-like  |
| 277 | XLOC_001172 | Zv9_00024544 | 1.068847    | 0.068 | 0.888 | 0.044Leader-like  |
| 278 | XLOC_009235 | Zv9_00050814 | 1.07728     | 0.006 | 0.846 | 0.148Leader-like  |
| 279 | XLOC_007361 | Zv9_00004625 | 1.0789515   | 0.052 | 0.946 | 0.002Leader-like  |
| 280 | XLOC_009843 | Zv9_00053049 | 1.0814414   | 0.016 | 0.984 | 0Leader-like      |
| 281 | XLOC_016017 | Zv9_00023435 | 1.0871805   | 0.252 | 0.748 | 0Leader-like      |
| 282 | XLOC_007290 | Zv9_00004390 | 1.092802    | 0.004 | 0.996 | 0Leader-like      |
| 283 | XLOC_002777 | Zv9_00030804 | 1.0945214   | 0.016 | 0.984 | 0Leader-like      |
| 284 | XLOC_009918 | Zv9_00053299 | 1.09567148  | 0     | 1     | 0Leader-like      |
| 285 | XLOC_006799 | Zv9_00002727 | 1.09946946  | 0.006 | 0.994 | 0Leader-like      |
| 286 | XLOC_012634 | Zv9_00011448 | 1.1034851   | 0.128 | 0.852 | 0.02Leader-like   |
| 287 | XLOC_002779 | Zv9_00030806 | 1.1186238   | 0.004 | 0.996 | 0Leader-like      |
| 288 | XLOC_013997 | Zv9_00016353 | 1.123561    | 0.01  | 0.99  | 0Leader-like      |
| 289 | XLOC_012258 | Zv9_00010117 | 1.13227794  | 0     | 1     | 0Leader-like      |
| 290 | XLOC_006924 | Zv9_00003128 | 1.133565    | 0.012 | 0.988 | 0Leader-like      |
| 291 | XLOC_013198 | Zv9_00013454 | 1.1410331   | 0.008 | 0.992 | 0Leader-like      |
| 292 | XLOC_002074 | Zv9_00027978 | 1.1514663   | 0     | 1     | 0Leader-like      |
| 293 | XLOC_014949 | Zv9_00019805 | 1.15788722  | 0.048 | 0.948 | 0.004Leader-like  |
| 294 | XLOC_002081 | Zv9_00028057 | 1.1804958   | 0.124 | 0.876 | 0Leader-like      |
| 295 | XLOC_010186 | Zv9_00054464 | 1.1830062   | 0.012 | 0.964 | 0.024Leader-like  |
| 296 | XLOC_007673 | Zv9_00045584 | 1.20184442  | 0.008 | 0.992 | 0Leader-like      |
| 297 | XLOC_006695 | Zv9_00044898 | 1.2089249   | 0     | 1     | 0Leader-like      |
| 298 | XLOC_004016 | Zv9_00035154 | 1.2907086   | 0.108 | 0.862 | 0.03Leader-like   |
| 299 | XLOC_006899 | Zv9_00003043 | 1.2970366   | 0.034 | 0.966 | 0Leader-like      |
| 300 | XLOC_004875 | Zv9_00038310 | 1.3168204   | 0.174 | 0.816 | 0.01Leader-like   |
| 301 | XLOC_002323 | Zv9_00029074 | 1.3294631   | 0.356 | 0.644 | 0Leader-like      |
| 302 | XLOC_014274 | Zv9_00017400 | 1.332423    | 0.058 | 0.93  | 0.012Leader-like  |
| 303 | XLOC_013409 | Zv9_00014280 | 1.3358359   | 0.314 | 0.686 | 0Leader-like      |
| 304 | XLOC_001961 | Zv9_00027517 | 1.3453034   | 0     | 1     | 0Leader-like      |
| 305 | XLOC_006555 | Zv9_00044522 | 1.3461064   | 0.036 | 0.964 | 0Leader-like      |
| 306 | XLOC_003376 | Zv9_00032975 | 1.3536725   | 0.188 | 0.812 | 0Leader-like      |
| 307 | XLOC_011741 | Zv9_00008330 | 1.3601835   | 0.026 | 0.974 | 0Leader-like      |
| 308 | XLOC_000069 | Zv9_00058048 | 1.373027    | 0.062 | 0.91  | 0.028Leader-like  |
| 309 | XLOC_012678 | Zv9_00011602 | 1.384471    | 0.108 | 0.89  | 0.002Leader-like  |
| 310 | XLOC_004010 | Zv9_00035133 | 1.3925373   | 0.114 | 0.846 | 0.04Leader-like   |
| 311 | XLOC_011042 | Zv9_00005794 | 1.404295    | 0.076 | 0.924 | 0Leader-like      |
| 312 | XLOC_010447 | Zv9_00055494 | 1.4383322   | 0.08  | 0.804 | 0.116Leader-like  |

|     |             |              |            |       |       |                  |
|-----|-------------|--------------|------------|-------|-------|------------------|
| 313 | XLOC_011215 | Zv9_00006400 | 1.45430093 | 0.484 | 0.516 | 0Leader-like     |
| 314 | XLOC_001223 | Zv9_00024672 | 1.4563405  | 0.006 | 0.988 | 0.006Leader-like |
| 315 | XLOC_009590 | Zv9_00052124 | 1.4613863  | 0.038 | 0.892 | 0.07Leader-like  |
| 316 | XLOC_003714 | Zv9_00034071 | 1.4628609  | 0.006 | 0.994 | 0Leader-like     |
| 317 | XLOC_002083 | Zv9_00028066 | 1.46385    | 0.1   | 0.884 | 0.016Leader-like |
| 318 | XLOC_010776 | Zv9_00056846 | 1.4727263  | 0.142 | 0.704 | 0.154Leader-like |
| 319 | XLOC_006952 | Zv9_00003201 | 1.4811542  | 0.072 | 0.928 | 0Leader-like     |
| 320 | XLOC_015349 | Zv9_00021128 | 1.4854559  | 0.32  | 0.674 | 0.006Leader-like |
| 321 | XLOC_003680 | Zv9_00033951 | 1.501263   | 0.17  | 0.826 | 0.004Leader-like |
| 322 | XLOC_002290 | Zv9_00028888 | 1.5085055  | 0.004 | 0.994 | 0.002Leader-like |
| 323 | XLOC_012743 | Zv9_00011860 | 1.52172406 | 0.128 | 0.87  | 0.002Leader-like |
| 324 | XLOC_009655 | Zv9_00052279 | 1.5303937  | 0.128 | 0.872 | 0Leader-like     |
| 325 | XLOC_012309 | Zv9_00010446 | 1.549212   | 0.012 | 0.988 | 0Leader-like     |
| 326 | XLOC_006228 | Zv9_00043473 | 1.568795   | 0.442 | 0.536 | 0.022Leader-like |
| 327 | XLOC_008633 | Zv9_00048716 | 1.5853332  | 0.07  | 0.93  | 0Leader-like     |
| 328 | XLOC_008139 | Zv9_00047019 | 1.588199   | 0.004 | 0.97  | 0.026Leader-like |
| 329 | XLOC_000873 | Zv9_00002190 | 1.6076713  | 0     | 1     | 0Leader-like     |
| 330 | XLOC_002444 | Zv9_00029555 | 1.6214696  | 0.01  | 0.976 | 0.014Leader-like |
| 331 | XLOC_015697 | Zv9_00022318 | 1.6287848  | 0.002 | 0.998 | 0Leader-like     |
| 332 | XLOC_001650 | Zv9_00026319 | 1.6550099  | 0.226 | 0.774 | 0Leader-like     |
| 333 | XLOC_014750 | Zv9_00019124 | 1.6738063  | 0.074 | 0.866 | 0.06Leader-like  |
| 334 | XLOC_016013 | Zv9_00023424 | 1.73571853 | 0.018 | 0.982 | 0Leader-like     |
| 335 | XLOC_014586 | Zv9_00018476 | 1.7362301  | 0.002 | 0.996 | 0.002Leader-like |
| 336 | XLOC_012251 | Zv9_00010088 | 1.7770662  | 0.034 | 0.966 | 0Leader-like     |
| 337 | XLOC_008404 | Zv9_00047975 | 1.7776441  | 0.12  | 0.874 | 0.006Leader-like |
| 338 | XLOC_012960 | Zv9_00012634 | 1.7931326  | 0.006 | 0.994 | 0Leader-like     |
| 339 | XLOC_005279 | Zv9_00039987 | 1.80840847 | 0.142 | 0.856 | 0.002Leader-like |
| 340 | XLOC_013672 | Zv9_00015175 | 1.838817   | 0.008 | 0.992 | 0Leader-like     |
| 341 | XLOC_014048 | Zv9_00016589 | 1.8789291  | 0.022 | 0.978 | 0Leader-like     |
| 342 | XLOC_014681 | Zv9_00018847 | 1.9486021  | 0.342 | 0.594 | 0.064Leader-like |
| 343 | XLOC_015833 | Zv9_00022842 | 1.96951442 | 0.074 | 0.926 | 0Leader-like     |
| 344 | XLOC_003186 | Zv9_00032233 | 1.9778307  | 0.054 | 0.944 | 0.002Leader-like |
| 345 | XLOC_000025 | Zv9_00058431 | 1.9788001  | 0.006 | 0.994 | 0Leader-like     |
| 346 | XLOC_014212 | Zv9_00017208 | 1.9865992  | 0.12  | 0.842 | 0.038Leader-like |
| 347 | XLOC_003064 | Zv9_00031824 | 2.03858    | 0.03  | 0.956 | 0.014Leader-like |
| 348 | XLOC_002195 | Zv9_00028496 | 2.04994    | 0.012 | 0.988 | 0Leader-like     |
| 349 | XLOC_008348 | Zv9_00047819 | 2.0692602  | 0.012 | 0.988 | 0Leader-like     |
| 350 | XLOC_005282 | Zv9_00039992 | 2.083931   | 0.322 | 0.67  | 0.008Leader-like |
| 351 | XLOC_005423 | Zv9_00040568 | 2.0862162  | 0     | 0.998 | 0.002Leader-like |
| 352 | XLOC_003416 | Zv9_00033103 | 2.1415162  | 0.25  | 0.75  | 0Leader-like     |
| 353 | XLOC_001646 | Zv9_00026302 | 2.15432264 | 0.008 | 0.992 | 0Leader-like     |
| 354 | XLOC_009676 | Zv9_00052377 | 2.1923748  | 0.298 | 0.678 | 0.024Leader-like |
| 355 | XLOC_014680 | Zv9_00018846 | 2.2333126  | 0.048 | 0.938 | 0.014Leader-like |
| 356 | XLOC_008940 | Zv9_00049826 | 2.2697741  | 0.042 | 0.948 | 0.01Leader-like  |
| 357 | XLOC_008736 | Zv9_00049020 | 2.27834409 | 0.23  | 0.77  | 0Leader-like     |
| 358 | XLOC_001715 | Zv9_00026526 | 2.296984   | 0.198 | 0.788 | 0.014Leader-like |
| 359 | XLOC_011309 | Zv9_00006769 | 2.3089852  | 0.008 | 0.932 | 0.06Leader-like  |
| 360 | XLOC_008489 | Zv9_00048216 | 2.312168   | 0     | 0.974 | 0.026Leader-like |
| 361 | XLOC_005996 | Zv9_00042707 | 2.31964356 | 0.084 | 0.916 | 0Leader-like     |
| 362 | XLOC_015019 | Zv9_00020005 | 2.3353059  | 0.032 | 0.486 | 0.482Leader-like |
| 363 | XLOC_007049 | Zv9_00003483 | 2.360727   | 0.044 | 0.956 | 0Leader-like     |
| 364 | XLOC_014220 | Zv9_00017232 | 2.37677557 | 0.036 | 0.962 | 0.002Leader-like |
| 365 | XLOC_013372 | Zv9_00014136 | 2.396578   | 0.036 | 0.964 | 0Leader-like     |
| 366 | XLOC_014514 | Zv9_00018260 | 2.3973466  | 0.05  | 0.93  | 0.02Leader-like  |
| 367 | XLOC_009408 | Zv9_00051377 | 2.4498607  | 0.054 | 0.944 | 0.002Leader-like |



|     |             |              |            |       |       |       |             |
|-----|-------------|--------------|------------|-------|-------|-------|-------------|
| 368 | XLOC_014871 | Zv9_00019564 | 2.4823171  | 0.342 | 0.56  | 0.098 | Leader-like |
| 369 | XLOC_013446 | Zv9_00014382 | 2.49144    | 0.012 | 0.988 | 0     | Leader-like |
| 370 | XLOC_008435 | Zv9_00048060 | 2.4950842  | 0.002 | 0.998 | 0     | Leader-like |
| 371 | XLOC_006959 | Zv9_00003210 | 2.5345849  | 0     | 1     | 0     | Leader-like |
| 372 | XLOC_011483 | Zv9_00007432 | 2.5960353  | 0.132 | 0.866 | 0.002 | Leader-like |
| 373 | XLOC_011560 | Zv9_00007679 | 2.60377849 | 0.006 | 0.994 | 0     | Leader-like |
| 374 | XLOC_014909 | Zv9_00019679 | 2.6420043  | 0.352 | 0.648 | 0     | Leader-like |
| 375 | XLOC_012651 | Zv9_00011503 | 2.66062017 | 0.008 | 0.992 | 0     | Leader-like |
| 376 | XLOC_007497 | Zv9_00005091 | 2.6772047  | 0     | 1     | 0     | Leader-like |
| 377 | XLOC_001885 | Zv9_00027170 | 2.6913178  | 0.022 | 0.978 | 0     | Leader-like |
| 378 | XLOC_009833 | Zv9_00052994 | 2.7186763  | 0.26  | 0.74  | 0     | Leader-like |
| 379 | XLOC_004354 | Zv9_00036392 | 2.7364314  | 0.23  | 0.77  | 0     | Leader-like |
| 380 | XLOC_016018 | Zv9_00023436 | 2.7624397  | 0     | 1     | 0     | Leader-like |
| 381 | XLOC_008355 | Zv9_00047840 | 2.9265102  | 0.006 | 0.994 | 0     | Leader-like |
| 382 | XLOC_005475 | Zv9_00040802 | 2.9704734  | 0.06  | 0.892 | 0.048 | Leader-like |
| 383 | XLOC_002023 | Zv9_00027771 | 2.9835989  | 0.014 | 0.986 | 0     | Leader-like |
| 384 | XLOC_013211 | Zv9_00013481 | 2.9896271  | 0.186 | 0.812 | 0.002 | Leader-like |
| 385 | XLOC_001390 | Zv9_00025345 | 2.99882336 | 0.008 | 0.992 | 0     | Leader-like |
| 386 | XLOC_002510 | Zv9_00029765 | 3.0407451  | 0.016 | 0.954 | 0.03  | Leader-like |
| 387 | XLOC_005290 | Zv9_00040039 | 3.0876601  | 0.006 | 0.994 | 0     | Leader-like |
| 388 | XLOC_002921 | Zv9_00031324 | 3.167395   | 0.092 | 0.908 | 0     | Leader-like |
| 389 | XLOC_010131 | Zv9_00054181 | 3.2422286  | 0.044 | 0.956 | 0     | Leader-like |
| 390 | XLOC_003893 | Zv9_00034705 | 3.242782   | 0.07  | 0.89  | 0.04  | Leader-like |
| 391 | XLOC_000214 | Zv9_00058238 | 3.249347   | 0     | 0.998 | 0.002 | Leader-like |
| 392 | XLOC_008038 | Zv9_00046723 | 3.2693669  | 0.086 | 0.914 | 0     | Leader-like |
| 393 | XLOC_012232 | Zv9_00010001 | 3.2714495  | 0.176 | 0.824 | 0     | Leader-like |
| 394 | XLOC_010092 | Zv9_00054010 | 3.2807821  | 0.116 | 0.884 | 0     | Leader-like |
| 395 | XLOC_010298 | Zv9_00054881 | 3.325683   | 0.006 | 0.988 | 0.006 | Leader-like |
| 396 | XLOC_012313 | Zv9_00010462 | 3.3291761  | 0.124 | 0.876 | 0     | Leader-like |
| 397 | XLOC_011958 | Zv9_00008968 | 3.4181227  | 0.008 | 0.992 | 0     | Leader-like |
| 398 | XLOC_000121 | Zv9_00058634 | 3.43333577 | 0.004 | 0.996 | 0     | Leader-like |
| 399 | XLOC_012855 | Zv9_00012321 | 3.45218229 | 0.058 | 0.94  | 0.002 | Leader-like |
| 400 | XLOC_013804 | Zv9_00015709 | 3.46190582 | 0.026 | 0.966 | 0.008 | Leader-like |
| 401 | XLOC_003588 | Zv9_00033639 | 3.48719021 | 0.144 | 0.85  | 0.006 | Leader-like |
| 402 | XLOC_015848 | Zv9_00022881 | 3.5008965  | 0.188 | 0.742 | 0.07  | Leader-like |
| 403 | XLOC_000230 | Zv9_00057801 | 3.5176759  | 0.032 | 0.968 | 0     | Leader-like |
| 404 | XLOC_013149 | Zv9_00013287 | 3.53965404 | 0.012 | 0.988 | 0     | Leader-like |
| 405 | XLOC_012618 | Zv9_00011412 | 3.67125705 | 0.262 | 0.686 | 0.052 | Leader-like |
| 406 | XLOC_007850 | Zv9_00046102 | 3.69970377 | 0.196 | 0.804 | 0     | Leader-like |
| 407 | XLOC_015913 | Zv9_00023143 | 3.70682    | 0.208 | 0.726 | 0.066 | Leader-like |
| 408 | XLOC_001376 | Zv9_00025303 | 3.7237175  | 0.048 | 0.952 | 0     | Leader-like |
| 409 | XLOC_009661 | Zv9_00052311 | 3.7516132  | 0.064 | 0.618 | 0.318 | Leader-like |
| 410 | XLOC_000713 | Zv9_00001621 | 3.7997229  | 0.072 | 0.926 | 0.002 | Leader-like |
| 411 | XLOC_013908 | Zv9_00016101 | 3.8277005  | 0.01  | 0.926 | 0.064 | Leader-like |
| 412 | XLOC_010432 | Zv9_00055436 | 3.8366931  | 0     | 0.992 | 0.008 | Leader-like |
| 413 | XLOC_011427 | Zv9_00007249 | 3.9345719  | 0.214 | 0.784 | 0.002 | Leader-like |
| 414 | XLOC_004166 | Zv9_00035708 | 3.96538362 | 0.002 | 0.998 | 0     | Leader-like |
| 415 | XLOC_010022 | Zv9_00053751 | 3.988422   | 0.168 | 0.832 | 0     | Leader-like |
| 416 | XLOC_004643 | Zv9_00037486 | 4.017417   | 0     | 1     | 0     | Leader-like |
| 417 | XLOC_002565 | Zv9_00030004 | 4.0557196  | 0.022 | 0.978 | 0     | Leader-like |
| 418 | XLOC_016116 | Zv9_00023789 | 4.0869549  | 0     | 1     | 0     | Leader-like |
| 419 | XLOC_007871 | Zv9_00046175 | 4.1325519  | 0.076 | 0.924 | 0     | Leader-like |
| 420 | XLOC_010179 | Zv9_00054435 | 4.259471   | 0.462 | 0.538 | 0     | Leader-like |
| 421 | XLOC_005076 | Zv9_00039192 | 4.273444   | 0.242 | 0.444 | 0.314 | Leader-like |
| 422 | XLOC_005313 | Zv9_00040143 | 4.442762   | 0.048 | 0.952 | 0     | Leader-like |

|     |             |              |            |       |       |                  |
|-----|-------------|--------------|------------|-------|-------|------------------|
| 423 | XLOC_010600 | Zv9_00056152 | 4.4928813  | 0.018 | 0.982 | 0Leader-like     |
| 424 | XLOC_004532 | Zv9_00037093 | 4.528806   | 0.098 | 0.498 | 0.404Leader-like |
| 425 | XLOC_002383 | Zv9_00029355 | 4.546796   | 0.13  | 0.87  | 0Leader-like     |
| 426 | XLOC_005414 | Zv9_00040525 | 4.5703824  | 0.394 | 0.596 | 0.011Leader-like |
| 427 | XLOC_006610 | Zv9_00044678 | 4.5845461  | 0.182 | 0.818 | 0Leader-like     |
| 428 | XLOC_000037 | Zv9_00058487 | 4.65092661 | 0.012 | 0.988 | 0Leader-like     |
| 429 | XLOC_008490 | Zv9_00048217 | 4.666695   | 0.006 | 0.984 | 0.011Leader-like |
| 430 | XLOC_011289 | Zv9_00006683 | 4.6687684  | 0.29  | 0.71  | 0Leader-like     |
| 431 | XLOC_013734 | Zv9_00015411 | 4.743831   | 0.056 | 0.944 | 0Leader-like     |
| 432 | XLOC_004269 | Zv9_00036037 | 4.7809066  | 0.488 | 0.512 | 0Leader-like     |
| 433 | XLOC_000292 | Zv9_00000127 | 4.96958968 | 0.062 | 0.934 | 0.004Leader-like |
| 434 | XLOC_015923 | Zv9_00023185 | 5.023893   | 0     | 1     | 0Leader-like     |
| 435 | XLOC_000607 | Zv9_00001205 | 5.0470297  | 0.036 | 0.964 | 0Leader-like     |
| 436 | XLOC_006329 | Zv9_00043762 | 5.061597   | 0.062 | 0.782 | 0.156Leader-like |
| 437 | XLOC_002018 | Zv9_00027739 | 5.0981935  | 0.004 | 0.996 | 0Leader-like     |
| 438 | XLOC_003884 | Zv9_00034692 | 5.1226788  | 0     | 1     | 0Leader-like     |
| 439 | XLOC_012210 | Zv9_00009908 | 5.2468713  | 0.006 | 0.994 | 0Leader-like     |
| 440 | XLOC_008372 | Zv9_00047897 | 5.2605173  | 0.006 | 0.994 | 0Leader-like     |
| 441 | XLOC_005182 | Zv9_00039574 | 5.26805314 | 0.06  | 0.936 | 0.004Leader-like |
| 442 | XLOC_005692 | Zv9_00041667 | 5.3382788  | 0.044 | 0.956 | 0Leader-like     |
| 443 | XLOC_008752 | Zv9_00049090 | 5.344558   | 0.002 | 0.998 | 0Leader-like     |
| 444 | XLOC_011718 | Zv9_00008272 | 5.4074581  | 0.002 | 0.998 | 0Leader-like     |
| 445 | XLOC_008971 | Zv9_00049961 | 5.4370099  | 0.042 | 0.954 | 0.004Leader-like |
| 446 | XLOC_003136 | Zv9_00032053 | 5.5331038  | 0.066 | 0.934 | 0Leader-like     |
| 447 | XLOC_009394 | Zv9_00051330 | 6.04478963 | 0.132 | 0.868 | 0Leader-like     |
| 448 | XLOC_007840 | Zv9_00046060 | 6.102765   | 0.002 | 0.998 | 0Leader-like     |
| 449 | XLOC_009449 | Zv9_00051614 | 6.1254572  | 0.188 | 0.618 | 0.194Leader-like |
| 450 | XLOC_001667 | Zv9_00026365 | 6.1720688  | 0.088 | 0.912 | 0Leader-like     |
| 451 | XLOC_011846 | Zv9_00008643 | 6.20527099 | 0.104 | 0.896 | 0Leader-like     |
| 452 | XLOC_011991 | Zv9_00009177 | 6.2057415  | 0.008 | 0.992 | 0Leader-like     |
| 453 | XLOC_004762 | Zv9_00037899 | 6.326055   | 0.026 | 0.944 | 0.03Leader-like  |
| 454 | XLOC_000053 | Zv9_00058526 | 6.41099417 | 0.272 | 0.728 | 0Leader-like     |
| 455 | XLOC_000217 | Zv9_00058240 | 6.597646   | 0.006 | 0.994 | 0Leader-like     |
| 456 | XLOC_007452 | Zv9_00004937 | 6.65729    | 0.066 | 0.818 | 0.116Leader-like |
| 457 | XLOC_004217 | Zv9_00035902 | 6.93802    | 0     | 1     | 0Leader-like     |
| 458 | XLOC_001477 | Zv9_00025662 | 6.95937    | 0.028 | 0.972 | 0Leader-like     |
| 459 | XLOC_004985 | Zv9_00038770 | 6.962514   | 0     | 1     | 0Leader-like     |
| 460 | XLOC_006756 | Zv9_00002565 | 7.043637   | 0.006 | 0.994 | 0Leader-like     |
| 461 | XLOC_006546 | Zv9_00044488 | 7.1732169  | 0.28  | 0.698 | 0.022Leader-like |
| 462 | XLOC_006561 | Zv9_00044534 | 7.1954571  | 0.128 | 0.87  | 0.002Leader-like |
| 463 | XLOC_001222 | Zv9_00024668 | 7.213794   | 0.024 | 0.976 | 0Leader-like     |
| 464 | XLOC_004549 | Zv9_00037144 | 7.4377846  | 0.202 | 0.798 | 0Leader-like     |
| 465 | XLOC_007146 | Zv9_00003971 | 7.4828937  | 0.02  | 0.978 | 0.002Leader-like |
| 466 | XLOC_007310 | Zv9_00004450 | 7.5549366  | 0.058 | 0.942 | 0Leader-like     |
| 467 | XLOC_001558 | Zv9_00025966 | 7.676304   | 0     | 1     | 0Leader-like     |
| 468 | XLOC_004011 | Zv9_00035134 | 7.718631   | 0.06  | 0.94  | 0Leader-like     |
| 469 | XLOC_008186 | Zv9_00047125 | 8.0202235  | 0.016 | 0.964 | 0.02Leader-like  |
| 470 | XLOC_004222 | Zv9_00035926 | 8.121872   | 0.012 | 0.986 | 0.002Leader-like |
| 471 | XLOC_000734 | Zv9_00001692 | 8.16756377 | 0.01  | 0.988 | 0.002Leader-like |
| 472 | XLOC_001327 | Zv9_00025103 | 8.1744968  | 0.112 | 0.68  | 0.208Leader-like |
| 473 | XLOC_007771 | Zv9_00045891 | 8.3081198  | 0     | 0.998 | 0.002Leader-like |
| 474 | XLOC_003395 | Zv9_00033030 | 8.520677   | 0.036 | 0.964 | 0Leader-like     |
| 475 | XLOC_002201 | Zv9_00028519 | 8.6200702  | 0.024 | 0.976 | 0Leader-like     |
| 476 | XLOC_001999 | Zv9_00027660 | 8.6673242  | 0.056 | 0.934 | 0.011Leader-like |
| 477 | XLOC_003706 | Zv9_00034055 | 8.674641   | 0.006 | 0.99  | 0.004Leader-like |

|     |             |              |             |       |       |                  |
|-----|-------------|--------------|-------------|-------|-------|------------------|
| 478 | XLOC_001771 | Zv9_00026768 | 8.6838351   | 0     | 1     | 0Leader-like     |
| 479 | XLOC_002388 | Zv9_00029365 | 8.7666038   | 0     | 1     | 0Leader-like     |
| 480 | XLOC_009572 | Zv9_00052074 | 8.9568969   | 0.024 | 0.976 | 0Leader-like     |
| 481 | XLOC_004334 | Zv9_00036288 | 8.9569727   | 0.002 | 0.994 | 0.004Leader-like |
| 482 | XLOC_008904 | Zv9_00049673 | 8.985924    | 0.09  | 0.746 | 0.164Leader-like |
| 483 | XLOC_002298 | Zv9_00028931 | 9.014754    | 0.004 | 0.996 | 0Leader-like     |
| 484 | XLOC_015782 | Zv9_00022610 | 9.1508372   | 0     | 1     | 0Leader-like     |
| 485 | XLOC_010182 | Zv9_00054443 | 9.263515    | 0     | 1     | 0Leader-like     |
| 486 | XLOC_004794 | Zv9_00038023 | 9.63520161  | 0     | 1     | 0Leader-like     |
| 487 | XLOC_006360 | Zv9_00043873 | 9.8339353   | 0.046 | 0.95  | 0.004Leader-like |
| 488 | XLOC_002596 | Zv9_00030138 | 9.8723861   | 0.044 | 0.944 | 0.012Leader-like |
| 489 | XLOC_015674 | Zv9_00022242 | 9.995298    | 0     | 1     | 0Leader-like     |
| 490 | XLOC_005610 | Zv9_00041403 | 10.2606914  | 0.02  | 0.972 | 0.008Leader-like |
| 491 | XLOC_015424 | Zv9_00021305 | 10.733602   | 0.002 | 0.996 | 0.002Leader-like |
| 492 | XLOC_004033 | Zv9_00035253 | 10.7478868  | 0.066 | 0.694 | 0.24Leader-like  |
| 493 | XLOC_015212 | Zv9_00020637 | 10.918396   | 0.04  | 0.916 | 0.044Leader-like |
| 494 | XLOC_015999 | Zv9_00023382 | 11.447087   | 0.002 | 0.998 | 0Leader-like     |
| 495 | XLOC_002256 | Zv9_00028729 | 11.915208   | 0.236 | 0.758 | 0.006Leader-like |
| 496 | XLOC_014389 | Zv9_00017913 | 12.2988516  | 0.058 | 0.898 | 0.044Leader-like |
| 497 | XLOC_007584 | Zv9_00045339 | 12.43439    | 0.256 | 0.73  | 0.014Leader-like |
| 498 | XLOC_013502 | Zv9_00014610 | 12.501078   | 0.106 | 0.894 | 0Leader-like     |
| 499 | XLOC_009071 | Zv9_00050227 | 12.50904374 | 0     | 1     | 0Leader-like     |
| 500 | XLOC_012886 | Zv9_00012411 | 12.6112496  | 0.03  | 0.97  | 0Leader-like     |
| 501 | XLOC_012051 | Zv9_00009452 | 12.911338   | 0     | 1     | 0Leader-like     |
| 502 | XLOC_008364 | Zv9_00047868 | 13.1761834  | 0     | 1     | 0Leader-like     |
| 503 | XLOC_010223 | Zv9_00054601 | 14.29883    | 0.138 | 0.862 | 0Leader-like     |
| 504 | XLOC_002080 | Zv9_00028052 | 14.459312   | 0     | 1     | 0Leader-like     |
| 505 | XLOC_011783 | Zv9_00008492 | 14.671283   | 0.04  | 0.948 | 0.012Leader-like |
| 506 | XLOC_015602 | Zv9_00022003 | 15.07503842 | 0     | 1     | 0Leader-like     |
| 507 | XLOC_013519 | Zv9_00014672 | 15.139083   | 0.358 | 0.584 | 0.058Leader-like |
| 508 | XLOC_011476 | Zv9_00007415 | 15.2104209  | 0.028 | 0.972 | 0Leader-like     |
| 509 | XLOC_015200 | Zv9_00020575 | 15.21796    | 0.412 | 0.586 | 0.002Leader-like |
| 510 | XLOC_005953 | Zv9_00042599 | 15.2678468  | 0.002 | 0.998 | 0Leader-like     |
| 511 | XLOC_007654 | Zv9_00045541 | 16.491847   | 0.056 | 0.914 | 0.03Leader-like  |
| 512 | XLOC_005041 | Zv9_00039015 | 17.112721   | 0.036 | 0.964 | 0Leader-like     |
| 513 | XLOC_015540 | Zv9_00021714 | 18.5108999  | 0     | 1     | 0Leader-like     |
| 514 | XLOC_010608 | Zv9_00056167 | 18.635354   | 0.008 | 0.866 | 0.126Leader-like |
| 515 | XLOC_011077 | Zv9_00005917 | 18.9156881  | 0.178 | 0.754 | 0.068Leader-like |
| 516 | XLOC_003056 | Zv9_00031795 | 19.7219994  | 0     | 1     | 0Leader-like     |
| 517 | XLOC_008110 | Zv9_00046921 | 20.00513227 | 0.13  | 0.87  | 0Leader-like     |
| 518 | XLOC_003744 | Zv9_00034192 | 20.187642   | 0.356 | 0.64  | 0.004Leader-like |
| 519 | XLOC_009672 | Zv9_00052370 | 20.392487   | 0.002 | 0.998 | 0Leader-like     |
| 520 | XLOC_006603 | Zv9_00044651 | 20.531462   | 0.002 | 0.998 | 0Leader-like     |
| 521 | XLOC_001505 | Zv9_00025745 | 20.54288    | 0.05  | 0.95  | 0Leader-like     |
| 522 | XLOC_002724 | Zv9_00030633 | 21.085909   | 0.288 | 0.594 | 0.118Leader-like |
| 523 | XLOC_009341 | Zv9_00051140 | 21.145255   | 0     | 0.998 | 0.002Leader-like |
| 524 | XLOC_007833 | Zv9_00046047 | 21.3581285  | 0.008 | 0.992 | 0Leader-like     |
| 525 | XLOC_007414 | Zv9_00004784 | 22.6187602  | 0.01  | 0.99  | 0Leader-like     |
| 526 | XLOC_011089 | Zv9_00005961 | 24.55229185 | 0     | 1     | 0Leader-like     |
| 527 | XLOC_012775 | Zv9_00011954 | 24.75164381 | 0     | 1     | 0Leader-like     |
| 528 | XLOC_005954 | Zv9_00042604 | 28.4068316  | 0.016 | 0.984 | 0Leader-like     |
| 529 | XLOC_002592 | Zv9_00030125 | 30.28547    | 0.004 | 0.94  | 0.056Leader-like |
| 530 | XLOC_001552 | Zv9_00025931 | 30.4861954  | 0     | 1     | 0Leader-like     |
| 531 | XLOC_014228 | Zv9_00017259 | 31.690417   | 0.096 | 0.904 | 0Leader-like     |
| 532 | XLOC_015788 | Zv9_00022628 | 32.249941   | 0     | 0.998 | 0.002Leader-like |

|     |             |              |             |       |       |                  |
|-----|-------------|--------------|-------------|-------|-------|------------------|
| 533 | XLOC_002722 | Zv9_00030627 | 32.5969884  | 0     | 1     | 0Leader-like     |
| 534 | XLOC_000021 | Zv9_00057916 | 34.5616185  | 0     | 0.996 | 0.004Leader-like |
| 535 | XLOC_009214 | Zv9_00050728 | 38.325013   | 0.378 | 0.622 | 0Leader-like     |
| 536 | XLOC_000312 | Zv9_00000167 | 39.6929     | 0.426 | 0.466 | 0.108Leader-like |
| 537 | XLOC_003593 | Zv9_00033658 | 43.41854    | 0.004 | 0.996 | 0Leader-like     |
| 538 | XLOC_008665 | Zv9_00048852 | 44.3828832  | 0.002 | 0.998 | 0Leader-like     |
| 539 | XLOC_004717 | Zv9_00037732 | 45.0367933  | 0     | 0.996 | 0.004Leader-like |
| 540 | XLOC_013584 | Zv9_00014853 | 45.203532   | 0.128 | 0.612 | 0.26Leader-like  |
| 541 | XLOC_008513 | Zv9_00048292 | 49.20164    | 0.492 | 0.508 | 0Leader-like     |
| 542 | XLOC_007387 | Zv9_00004701 | 52.42374    | 0.006 | 0.986 | 0.008Leader-like |
| 543 | XLOC_014520 | Zv9_00018277 | 55.1180032  | 0.002 | 0.998 | 0Leader-like     |
| 544 | XLOC_005565 | Zv9_00041220 | 55.837282   | 0.298 | 0.588 | 0.114Leader-like |
| 545 | XLOC_006249 | Zv9_00043518 | 59.64654547 | 0     | 1     | 0Leader-like     |
| 546 | XLOC_011965 | Zv9_00009030 | 66.5487198  | 0.006 | 0.994 | 0Leader-like     |
| 547 | XLOC_009210 | Zv9_00050700 | 70.0251452  | 0     | 0.99  | 0.01Leader-like  |
| 548 | XLOC_002634 | Zv9_00030320 | 79.3304762  | 0     | 0.998 | 0.002Leader-like |
| 549 | XLOC_005104 | Zv9_00039287 | 79.75907    | 0.444 | 0.556 | 0Leader-like     |
| 550 | XLOC_009920 | Zv9_00053302 | 106.8412477 | 0.004 | 0.996 | 0Leader-like     |
| 551 | XLOC_008222 | Zv9_00047229 | 173.619106  | 0.132 | 0.866 | 0.002Leader-like |
| 552 | XLOC_001359 | Zv9_00025214 | 188.1069    | 0.002 | 0.998 | 0Leader-like     |
| 553 | XLOC_015262 | Zv9_00020821 | 311.593169  | 0     | 1     | 0Leader-like     |
| 554 | XLOC_006529 | Zv9_00044431 | 397.70705   | 0     | 1     | 0Leader-like     |
| 555 | XLOC_003759 | Zv9_00034241 | 1078.04323  | 0.204 | 0.796 | 0Leader-like     |
| 556 | XLOC_004004 | Zv9_00035097 | 1.3567541   | 0.016 | 0.222 | 0.762Coding      |
| 557 | XLOC_000033 | Zv9_00057349 | 1.8965754   | 0.002 | 0.37  | 0.628Coding      |
| 558 | XLOC_005840 | Zv9_00042206 | 2.052558    | 0.182 | 0.354 | 0.464Coding      |
| 559 | XLOC_002992 | Zv9_00031572 | 2.5587812   | 0.046 | 0.336 | 0.618Coding      |
| 560 | XLOC_002221 | Zv9_00028600 | 2.725521    | 0     | 0.28  | 0.72Coding       |
| 561 | XLOC_003868 | Zv9_00034646 | 2.8464983   | 0.016 | 0.356 | 0.628Coding      |
| 562 | XLOC_005827 | Zv9_00042153 | 2.8981115   | 0.046 | 0.204 | 0.75Coding       |
| 563 | XLOC_015693 | Zv9_00022307 | 3.3292844   | 0.144 | 0.218 | 0.638Coding      |
| 564 | XLOC_001517 | Zv9_00025791 | 3.392814    | 0.018 | 0.292 | 0.69Coding       |
| 565 | XLOC_003924 | Zv9_00034838 | 3.5879869   | 0     | 0.236 | 0.764Coding      |
| 566 | XLOC_004614 | Zv9_00037383 | 4.181527    | 0.03  | 0.468 | 0.502Coding      |
| 567 | XLOC_011166 | Zv9_00006258 | 4.5557923   | 0.016 | 0.288 | 0.696Coding      |
| 568 | XLOC_005771 | Zv9_00041874 | 4.867899    | 0     | 0.238 | 0.762Coding      |
| 569 | XLOC_003290 | Zv9_00032675 | 5.024178    | 0     | 0.222 | 0.778Coding      |
| 570 | XLOC_006566 | Zv9_00044551 | 6.171558    | 0     | 0.136 | 0.864Coding      |
| 571 | XLOC_015311 | Zv9_00020981 | 7.55166     | 0.018 | 0.082 | 0.9Coding        |
| 572 | XLOC_000005 | Zv9_00058396 | 7.729297    | 0.184 | 0.374 | 0.442Coding      |
| 573 | XLOC_006538 | Zv9_00044467 | 7.733404    | 0.074 | 0.418 | 0.508Coding      |
| 574 | XLOC_006039 | Zv9_00042842 | 8.126586    | 0.092 | 0.308 | 0.6Coding        |
| 575 | XLOC_002650 | Zv9_00030367 | 8.487948    | 0     | 0.006 | 0.994Coding      |
| 576 | XLOC_001276 | Zv9_00024864 | 9.643782    | 0.192 | 0.178 | 0.63Coding       |
| 577 | XLOC_007216 | Zv9_00004150 | 10.755369   | 0.004 | 0.326 | 0.67Coding       |
| 578 | XLOC_014434 | Zv9_00018057 | 11.043864   | 0     | 0.12  | 0.88Coding       |
| 579 | XLOC_002564 | Zv9_00029999 | 11.2544091  | 0.096 | 0.38  | 0.524Coding      |
| 580 | XLOC_001224 | Zv9_00024673 | 11.639026   | 0     | 0.048 | 0.952Coding      |
| 581 | XLOC_010136 | Zv9_00054214 | 11.84479    | 0.02  | 0.476 | 0.504Coding      |
| 582 | XLOC_015406 | Zv9_00021248 | 12.2935259  | 0.046 | 0.408 | 0.546Coding      |
| 583 | XLOC_005751 | Zv9_00041815 | 12.78148365 | 0.198 | 0.284 | 0.518Coding      |
| 584 | XLOC_004683 | Zv9_00037626 | 14.1070173  | 0     | 0.008 | 0.992Coding      |
| 585 | XLOC_007518 | Zv9_00005205 | 14.361285   | 0     | 0.042 | 0.958Coding      |
| 586 | XLOC_000977 | Zv9_00002559 | 15.71514    | 0.002 | 0.126 | 0.872Coding      |
| 587 | XLOC_004049 | Zv9_00035330 | 21.34658    | 0.002 | 0.092 | 0.906Coding      |

|     |             |              |            |       |       |             |
|-----|-------------|--------------|------------|-------|-------|-------------|
| 588 | XLOC_004930 | Zv9_00038563 | 26.24835   | 0.002 | 0.354 | 0.644Coding |
| 589 | XLOC_000198 | Zv9_00058196 | 28.5328354 | 0.232 | 0.266 | 0.502Coding |
| 590 | XLOC_009981 | Zv9_00053557 | 34.77061   | 0.166 | 0.246 | 0.588Coding |
| 591 | XLOC_002096 | Zv9_00028138 | 38.62973   | 0     | 0.02  | 0.98Coding  |
| 592 | XLOC_002904 | Zv9_00031256 | 41.4699498 | 0.004 | 0.218 | 0.778Coding |
| 593 | XLOC_006755 | Zv9_00045093 | 47.148359  | 0.028 | 0.342 | 0.63Coding  |
| 594 | XLOC_012353 | Zv9_00010606 | 51.4442    | 0.008 | 0.134 | 0.858Coding |
| 595 | XLOC_000035 | Zv9_00057973 | 57.5244    | 0     | 0.12  | 0.88Coding  |
| 596 | XLOC_000316 | Zv9_00000174 | 59.3678911 | 0.002 | 0.032 | 0.966Coding |
| 597 | XLOC_000019 | Zv9_00057323 | 72.09165   | 0.002 | 0.11  | 0.888Coding |
| 598 | XLOC_008783 | Zv9_00049191 | 72.23685   | 0.006 | 0.308 | 0.686Coding |
| 599 | XLOC_014208 | Zv9_00017190 | 79.2597358 | 0     | 0     | 1Coding     |
| 600 | XLOC_002027 | Zv9_00027779 | 112.91106  | 0.152 | 0.328 | 0.52Coding  |
| 601 | XLOC_002891 | Zv9_00031207 | 126.469244 | 0.008 | 0.07  | 0.922Coding |
| 602 | XLOC_001758 | Zv9_00026705 | 135.84522  | 0.178 | 0.31  | 0.512Coding |
| 603 | XLOC_003220 | Zv9_00032370 | 161.57448  | 0.004 | 0.294 | 0.702Coding |
| 604 | XLOC_002920 | Zv9_00031321 | 203.499603 | 0.198 | 0.038 | 0.764Coding |
| 605 | XLOC_001882 | Zv9_00027164 | 216.544007 | 0     | 0.006 | 0.994Coding |
| 606 | XLOC_005023 | Zv9_00038944 | 380.5486   | 0.012 | 0.01  | 0.978Coding |
| 607 | XLOC_005031 | Zv9_00038978 | 506.80071  | 0     | 0     | 1Coding     |
| 608 | XLOC_010160 | Zv9_00054343 | 556.65686  | 0.022 | 0.008 | 0.97Coding  |

**Table S3. TOC predictions for lncRNAs from Ulitsky et al., 2011**

TOC was used to classify proposed zebrafish lncRNAs from Ulitsky et al., 2011. Listed are the name of the locus (XLOC\_XXX), the transcript identifier and the RNA-Seq based expression level in fragments per kilobase of exon per million fragments mapped (FPKM). For the most coding-like ORF (for predicted coding transcripts) or leader-like ORF (for predicted leader-like or trailer-like transcripts) within a transcript, the list shows the relative frequency of trees that classify that ORF as trailer, leader or coding. Note that this ORF may not necessarily be the longest or the most RPF-dense ORF within the locus. The last column contains the resulting TOC-based classification for the particular transcript. Transcript structures with all associated metadata (chromosome start/end, strand, locus name, isoform name, exon-intron structure) are accessible as GTF files at Gene Expression Omnibus (GEO) (accession number GSE46512).

|    | Locus       | Transcript              | FPKM       | Trailer | Leader | Coding | Prediction    |
|----|-------------|-------------------------|------------|---------|--------|--------|---------------|
| 1  | XLOC_003338 | linc-loc563932_1        | 1.02832353 | 1       | 0      |        | 0Trailer-like |
| 2  | XLOC_007630 | linc-six1b_1            | 1.0426557  | 1       | 0      |        | 0Trailer-like |
| 3  | XLOC_011092 | linc-arl6ip1_2          | 1.06349645 | 0.722   | 0.278  |        | 0Trailer-like |
| 4  | XLOC_010285 | linc-fam164a_2_1        | 1.1753453  | 1       | 0      |        | 0Trailer-like |
| 5  | XLOC_002703 | linc-wu:fc09a11_1       | 1.1772022  | 1       | 0      |        | 0Trailer-like |
| 6  | XLOC_007184 | linc-dis3l2_1           | 1.2271673  | 0.798   | 0.202  |        | 0Trailer-like |
| 7  | XLOC_003234 | linc-loc100333296_1     | 1.237194   | 1       | 0      |        | 0Trailer-like |
| 8  | XLOC_002640 | linc-meis1_1            | 1.2744843  | 1       | 0      |        | 0Trailer-like |
| 9  | XLOC_015869 | linc-ihha_1             | 1.2963935  | 0.834   | 0.166  |        | 0Trailer-like |
| 10 | XLOC_013879 | linc-srsf3a_1           | 1.30493786 | 1       | 0      |        | 0Trailer-like |
| 11 | XLOC_011738 | linc-foxp2_1            | 1.3132349  | 1       | 0      |        | 0Trailer-like |
| 12 | XLOC_002337 | linc-zgc:194486_1       | 1.3427258  | 0.906   | 0.092  | 0.002  | Trailer-like  |
| 13 | XLOC_010337 | linc-zgc:92458_1        | 1.42449429 | 1       | 0      |        | 0Trailer-like |
| 14 | XLOC_006917 | linc-zgc:153637_1       | 1.5231788  | 0.638   | 0.186  | 0.176  | Trailer-like  |
| 15 | XLOC_009260 | linc-ahr2_1             | 1.66097577 | 0.702   | 0.298  |        | 0Trailer-like |
| 16 | XLOC_003708 | linc-adrb2a_1           | 1.72534844 | 1       | 0      |        | 0Trailer-like |
| 17 | XLOC_010359 | linc-klhl14_1           | 1.8025996  | 1       | 0      |        | 0Trailer-like |
| 18 | XLOC_016059 | linc-gabpa_1            | 1.95313238 | 0.918   | 0.082  |        | 0Trailer-like |
| 19 | XLOC_012631 | linc-tars_1             | 1.9632785  | 0.966   | 0.034  |        | 0Trailer-like |
| 20 | XLOC_009582 | linc-casz1_1            | 2.0734445  | 0.994   | 0.006  |        | 0Trailer-like |
| 21 | XLOC_000496 | linc-b8a4r6_danre_1     | 2.2596556  | 0.752   | 0.23   | 0.018  | Trailer-like  |
| 22 | XLOC_010722 | linc-im:7145024_1       | 2.4175612  | 0.664   | 0.334  | 0.002  | Trailer-like  |
| 23 | XLOC_004271 | linc-arl4a_1            | 2.522661   | 0.914   | 0.086  |        | 0Trailer-like |
| 24 | XLOC_011975 | linc-loc100001765_1     | 2.57446719 | 1       | 0      |        | 0Trailer-like |
| 25 | XLOC_000777 | linc-anp32b_3           | 2.6007957  | 0.994   | 0.006  |        | 0Trailer-like |
| 26 | XLOC_011787 | linc-zgc:63566_1        | 2.6025037  | 1       | 0      |        | 0Trailer-like |
| 27 | XLOC_010197 | linc-adarb2_1           | 2.639227   | 0.998   | 0.002  |        | 0Trailer-like |
| 28 | XLOC_007373 | linc-si:dkey-193b15.6_1 | 2.9988947  | 1       | 0      |        | 0Trailer-like |
| 29 | XLOC_006210 | linc-hoxa3a_1           | 3.0705964  | 0.968   | 0.032  |        | 0Trailer-like |
| 30 | XLOC_006547 | linc-hoxa3a_2_1         | 3.08751721 | 0.884   | 0.116  |        | 0Trailer-like |
| 31 | XLOC_006400 | linc-gpd1_1             | 3.14883945 | 0.702   | 0.152  | 0.146  | Trailer-like  |
| 32 | XLOC_009640 | linc-hoxc1a_1           | 3.22592314 | 1       | 0      |        | 0Trailer-like |
| 33 | XLOC_009895 | linc-nr4a1_1            | 3.2716755  | 1       | 0      |        | 0Trailer-like |
| 34 | XLOC_011804 | linc-pus7l_(1_of_3)_1   | 3.3067262  | 0.764   | 0.088  | 0.148  | Trailer-like  |
| 35 | XLOC_001839 | linc-zgc:66127_1        | 3.399651   | 0.846   | 0.154  |        | 0Trailer-like |
| 36 | XLOC_003522 | linc-trpc7_1            | 3.48593045 | 0.892   | 0.106  | 0.002  | Trailer-like  |

|    |             |                          |             |       |       |                   |
|----|-------------|--------------------------|-------------|-------|-------|-------------------|
| 37 | XLOC_013192 | linc-tbx2a_1             | 3.5626439   | 1     | 0     | 0Trailer-like     |
| 38 | XLOC_013132 | linc-zgc:100930_3_1      | 3.5796523   | 0.88  | 0.12  | 0Trailer-like     |
| 39 | XLOC_009939 | linc-elovl4b_1           | 3.6326382   | 1     | 0     | 0Trailer-like     |
| 40 | XLOC_004386 | linc-trim71_1            | 3.7646588   | 1     | 0     | 0Trailer-like     |
| 41 | XLOC_011701 | linc-arid2_2             | 3.849897    | 0.526 | 0.302 | 0.172Trailer-like |
| 42 | XLOC_004994 | linc-rbm24b_1            | 4.03788422  | 0.866 | 0.134 | 0Trailer-like     |
| 43 | XLOC_010945 | linc-slc9a3r2_(2_of_3)_1 | 4.1937986   | 0.998 | 0.002 | 0Trailer-like     |
| 44 | XLOC_001588 | linc-zgc:100909_2        | 4.889172    | 0.654 | 0.344 | 0.002Trailer-like |
| 45 | XLOC_011071 | linc-tom1_1              | 5.2338246   | 0.522 | 0.478 | 0Trailer-like     |
| 46 | XLOC_011005 | linc-ubtf_2              | 5.274727    | 0.504 | 0.494 | 0.002Trailer-like |
| 47 | XLOC_001659 | linc-cnm3_2              | 5.343327    | 0.726 | 0.274 | 0Trailer-like     |
| 48 | XLOC_013752 | linc-pou3f3b_2_1         | 5.5023425   | 0.514 | 0.486 | 0Trailer-like     |
| 49 | XLOC_004593 | linc-rbms3_1             | 5.5434412   | 1     | 0     | 0Trailer-like     |
| 50 | XLOC_015196 | linc-bnip3la_1           | 5.70988603  | 1     | 0     | 0Trailer-like     |
| 51 | XLOC_013156 | linc-nr2f1a_1            | 5.73866378  | 0.666 | 0.334 | 0Trailer-like     |
| 52 | XLOC_003352 | linc-arhgef37_1          | 6.038752    | 0.788 | 0.174 | 0.038Trailer-like |
| 53 | XLOC_005286 | linc-asb2b_1             | 6.1307168   | 1     | 0     | 0Trailer-like     |
| 54 | XLOC_006566 | linc-tshz1_1             | 6.171558    | 0.914 | 0.086 | 0Trailer-like     |
| 55 | XLOC_012472 | linc-lman2lb_1           | 6.5478745   | 0.884 | 0.116 | 0Trailer-like     |
| 56 | XLOC_013476 | linc-bcl6a_1             | 7.4236326   | 0.996 | 0.004 | 0Trailer-like     |
| 57 | XLOC_014463 | linc-zgc:112142_1        | 8.00696063  | 0.746 | 0.252 | 0.002Trailer-like |
| 58 | XLOC_005785 | linc-pex16_1             | 8.5182605   | 0.958 | 0.04  | 0.002Trailer-like |
| 59 | XLOC_004053 | linc-zgc:158647_1        | 9.4648974   | 1     | 0     | 0Trailer-like     |
| 60 | XLOC_001038 | linc-ca9_1               | 9.682703    | 0.978 | 0.022 | 0Trailer-like     |
| 61 | XLOC_007476 | linc-ghrhr_1             | 13.6866688  | 1     | 0     | 0Trailer-like     |
| 62 | XLOC_005849 | linc-dnaja2l_2           | 13.856592   | 0.936 | 0.064 | 0Trailer-like     |
| 63 | XLOC_000304 | linc-zgc:77005_1         | 14.9139866  | 0.876 | 0.124 | 0Trailer-like     |
| 64 | XLOC_007499 | linc-jund_1              | 15.104697   | 1     | 0     | 0Trailer-like     |
| 65 | XLOC_001020 | linc-loc561183_1         | 16.474342   | 0.632 | 0.158 | 0.21Trailer-like  |
| 66 | XLOC_011132 | linc-carm1_1             | 17.6241727  | 0.584 | 0.416 | 0Trailer-like     |
| 67 | XLOC_006380 | linc-zgc:92022_1         | 24.737839   | 0.926 | 0.074 | 0Trailer-like     |
| 68 | XLOC_003380 | linc-cfl2l_1             | 26.170544   | 1     | 0     | 0Trailer-like     |
| 69 | XLOC_013753 | linc-pou3f3b_1           | 27.765557   | 1     | 0     | 0Trailer-like     |
| 70 | XLOC_008578 | linc-kiaa1432_1          | 29.659719   | 1     | 0     | 0Trailer-like     |
| 71 | XLOC_009186 | linc-zgc:123349_1        | 30.09301    | 1     | 0     | 0Trailer-like     |
| 72 | XLOC_004971 | linc-rpz_1               | 34.923526   | 0.97  | 0.02  | 0.01Trailer-like  |
| 73 | XLOC_008010 | linc-si:rp71-4m17.1_1    | 35.759111   | 0.866 | 0.134 | 0Trailer-like     |
| 74 | XLOC_012543 | linc-a2bhd7_danre_1      | 37.7745282  | 1     | 0     | 0Trailer-like     |
| 75 | XLOC_013258 | linc-nrarpb_1            | 43.4922986  | 1     | 0     | 0Trailer-like     |
| 76 | XLOC_014010 | linc-loc557798_1         | 97.81982    | 1     | 0     | 0Trailer-like     |
| 77 | XLOC_009920 | linc-hoxc6a_1            | 106.8412477 | 1     | 0     | 0Trailer-like     |
| 78 | XLOC_003108 | linc-tmem39b(cyrano)_1   | 123.00293   | 0.984 | 0.016 | 0Trailer-like     |
| 79 | XLOC_007114 | linc-twsg1a_1            | 223.20074   | 1     | 0     | 0Trailer-like     |
| 80 | XLOC_001288 | linc-epb4.114_1          | 224.81306   | 0.92  | 0.08  | 0Trailer-like     |
| 81 | XLOC_004459 | linc-otoa_1              | 1.0546459   | 0     | 0.99  | 0.01Leader-like   |
| 82 | XLOC_001910 | linc-wu:fc28f08_1        | 1.0985919   | 0.006 | 0.528 | 0.466Leader-like  |
| 83 | XLOC_008547 | linc-loc563783_1         | 1.1047153   | 0.088 | 0.892 | 0.02Leader-like   |
| 84 | XLOC_003684 | linc-sox3_1              | 1.1166627   | 0.116 | 0.848 | 0.036Leader-like  |
| 85 | XLOC_008939 | linc-loc100006557_1      | 1.12148877  | 0.016 | 0.708 | 0.276Leader-like  |
| 86 | XLOC_008508 | linc-loc557064_2         | 1.15264745  | 0.006 | 0.994 | 0Leader-like      |
| 87 | XLOC_009544 | linc-q58ee7_danre_1      | 1.1963674   | 0.038 | 0.962 | 0Leader-like      |
| 88 | XLOC_006695 | linc-si:dkeyp-66g8.1_1   | 1.2089249   | 0.008 | 0.992 | 0Leader-like      |
| 89 | XLOC_004970 | linc-mtmr11_1            | 1.2106429   | 0.042 | 0.958 | 0Leader-like      |
| 90 | XLOC_004569 | linc-loc100329297_2      | 1.21104132  | 0.196 | 0.782 | 0.022Leader-like  |
| 91 | XLOC_000346 | linc-xpa_1               | 1.2180429   | 0.166 | 0.834 | 0Leader-like      |

|     |             |                          |             |       |       |       |             |
|-----|-------------|--------------------------|-------------|-------|-------|-------|-------------|
| 92  | XLOC_014351 | linc-zgc:101653_1        | 1.29781231  | 0.282 | 0.708 | 0.01  | Leader-like |
| 93  | XLOC_015819 | linc-zgc:158316_1        | 1.3321122   | 0.054 | 0.946 | 0     | Leader-like |
| 94  | XLOC_012763 | linc-zgc:158317_1        | 1.3523416   | 0.006 | 0.994 | 0     | Leader-like |
| 95  | XLOC_003246 | linc-gabra2_(2_of_3)_1   | 1.380774194 | 0.102 | 0.898 | 0     | Leader-like |
| 96  | XLOC_015867 | linc-creg2_1             | 1.3885485   | 0.316 | 0.346 | 0.338 | Leader-like |
| 97  | XLOC_012128 | linc-pus7l_1             | 1.45505133  | 0.048 | 0.948 | 0.004 | Leader-like |
| 98  | XLOC_008297 | linc-cdk9_1              | 1.4582659   | 0.004 | 0.996 | 0     | Leader-like |
| 99  | XLOC_013240 | linc-loc100331916_1      | 1.4759021   | 0.118 | 0.882 | 0     | Leader-like |
| 100 | XLOC_015201 | linc-lrrtm4l2_1          | 1.481703    | 0.006 | 0.994 | 0     | Leader-like |
| 101 | XLOC_005821 | linc-zgc:158458_1        | 1.49173447  | 0.244 | 0.544 | 0.212 | Leader-like |
| 102 | XLOC_010184 | linc-napgl_1             | 1.52314343  | 0     | 1     | 0     | Leader-like |
| 103 | XLOC_008579 | linc-txn1l_1             | 1.587575    | 0.034 | 0.966 | 0     | Leader-like |
| 104 | XLOC_015010 | linc-mc3r_1              | 1.59740169  | 0.016 | 0.984 | 0     | Leader-like |
| 105 | XLOC_003622 | linc-cpeb4_1             | 1.6807823   | 0.336 | 0.476 | 0.188 | Leader-like |
| 106 | XLOC_002421 | linc-zgc:171432_1        | 1.6945583   | 0.152 | 0.778 | 0.07  | Leader-like |
| 107 | XLOC_010191 | linc-zgc:92030_1         | 1.7240712   | 0.04  | 0.96  | 0     | Leader-like |
| 108 | XLOC_007643 | linc-ras11b_3            | 1.7352838   | 0     | 1     | 0     | Leader-like |
| 109 | XLOC_005060 | linc-arid4a_1            | 1.7647158   | 0.13  | 0.848 | 0.022 | Leader-like |
| 110 | XLOC_012188 | linc-impdh1b_1           | 1.78472933  | 0.124 | 0.64  | 0.236 | Leader-like |
| 111 | XLOC_012976 | linc-zfand5a_1           | 1.8726721   | 0.13  | 0.842 | 0.028 | Leader-like |
| 112 | XLOC_006415 | linc-osbp110_(1_of_2)_1  | 1.9167042   | 0.098 | 0.902 | 0     | Leader-like |
| 113 | XLOC_002556 | linc-loc100334139_1      | 1.9646057   | 0.01  | 0.99  | 0     | Leader-like |
| 114 | XLOC_012959 | linc-atp6v1a1_1          | 1.9697837   | 0.17  | 0.828 | 0.002 | Leader-like |
| 115 | XLOC_006801 | linc-zgc:175148_1        | 1.986941    | 0.05  | 0.95  | 0     | Leader-like |
| 116 | XLOC_000688 | linc-zgc:103678_1        | 2.0697627   | 0.002 | 0.998 | 0     | Leader-like |
| 117 | XLOC_004803 | linc-otoa_2              | 2.0698347   | 0.004 | 0.996 | 0     | Leader-like |
| 118 | XLOC_009770 | linc-loc569344_1         | 2.13654367  | 0.288 | 0.704 | 0.008 | Leader-like |
| 119 | XLOC_006268 | linc-sox4a_2             | 2.22769321  | 0.006 | 0.988 | 0.006 | Leader-like |
| 120 | XLOC_014340 | linc-b0ux50_danre_1      | 2.25728     | 0     | 1     | 0     | Leader-like |
| 121 | XLOC_005959 | linc-si:dkeyp-59c12.1_1  | 2.2616039   | 0.062 | 0.916 | 0.022 | Leader-like |
| 122 | XLOC_013917 | linc-ctsz_1              | 2.2635818   | 0.36  | 0.458 | 0.182 | Leader-like |
| 123 | XLOC_012537 | linc-ptges_1             | 2.26430971  | 0.044 | 0.952 | 0.004 | Leader-like |
| 124 | XLOC_004147 | linc-trappc6bl_2_1       | 2.269677    | 0.014 | 0.678 | 0.308 | Leader-like |
| 125 | XLOC_003882 | linc-c11orf53_(2_of_2)_1 | 2.45413306  | 0.322 | 0.592 | 0.086 | Leader-like |
| 126 | XLOC_002971 | linc-six3a_1             | 2.4596459   | 0.032 | 0.968 | 0     | Leader-like |
| 127 | XLOC_005181 | linc-g2e3_1              | 2.461541    | 0.026 | 0.844 | 0.13  | Leader-like |
| 128 | XLOC_012086 | linc-stab2_1             | 2.4661962   | 0.11  | 0.882 | 0.008 | Leader-like |
| 129 | XLOC_011866 | linc-guca1a_1            | 2.4680412   | 0.06  | 0.94  | 0     | Leader-like |
| 130 | XLOC_001958 | linc-kdm5ba_1            | 2.471797    | 0.026 | 0.876 | 0.098 | Leader-like |
| 131 | XLOC_007006 | linc-tnw_1               | 2.5136181   | 0.096 | 0.904 | 0     | Leader-like |
| 132 | XLOC_002538 | linc-loc100004911_1      | 2.5172519   | 0.046 | 0.942 | 0.012 | Leader-like |
| 133 | XLOC_014937 | linc-si:dkey-23c22.6_2   | 2.5658727   | 0     | 1     | 0     | Leader-like |
| 134 | XLOC_011224 | linc-zgc:153426_1        | 2.5943293   | 0.01  | 0.986 | 0.004 | Leader-like |
| 135 | XLOC_016073 | linc-hibch_1             | 2.6103113   | 0.062 | 0.938 | 0     | Leader-like |
| 136 | XLOC_011592 | linc-axin1_1             | 2.6433725   | 0.004 | 0.992 | 0.004 | Leader-like |
| 137 | XLOC_012262 | linc-zgc:174696_1        | 2.659549    | 0     | 1     | 0     | Leader-like |
| 138 | XLOC_009919 | linc-hoxc9a_1            | 2.6805247   | 0.144 | 0.832 | 0.024 | Leader-like |
| 139 | XLOC_002706 | linc-c10orf11_1          | 2.688235    | 0.074 | 0.926 | 0     | Leader-like |
| 140 | XLOC_009814 | linc-dpm1_1              | 2.694365    | 0.016 | 0.984 | 0     | Leader-like |
| 141 | XLOC_001014 | linc-snx30_1             | 2.77502661  | 0.004 | 0.994 | 0.002 | Leader-like |
| 142 | XLOC_011667 | linc-zgc:194562_2        | 2.8889572   | 0     | 0.994 | 0.006 | Leader-like |
| 143 | XLOC_015363 | linc-rhoad_1             | 2.9752598   | 0.294 | 0.706 | 0     | Leader-like |
| 144 | XLOC_010058 | linc-loc556735_1         | 2.9945627   | 0     | 0.996 | 0.004 | Leader-like |
| 145 | XLOC_005036 | linc-zgc:112161_1        | 3.1198091   | 0.062 | 0.938 | 0     | Leader-like |
| 146 | XLOC_008583 | linc-si:rp71-1h20.5_1    | 3.2184663   | 0.038 | 0.922 | 0.04  | Leader-like |



|     |             |                         |            |       |       |                  |
|-----|-------------|-------------------------|------------|-------|-------|------------------|
| 147 | XLOC_011666 | linc-zgc:194562_1       | 3.29457668 | 0.084 | 0.916 | 0Leader-like     |
| 148 | XLOC_012371 | linc-cabp7_(2_of_2)_1   | 3.3281833  | 0     | 1     | 0Leader-like     |
| 149 | XLOC_015478 | linc-prdm16_1           | 3.3540217  | 0.38  | 0.596 | 0.024Leader-like |
| 150 | XLOC_014339 | linc-loc563901_1        | 3.362346   | 0     | 1     | 0Leader-like     |
| 151 | XLOC_011434 | linc-hoxb8a_2           | 3.5071564  | 0.22  | 0.778 | 0.002Leader-like |
| 152 | XLOC_010387 | linc-im:7147678_1       | 3.7611453  | 0.056 | 0.942 | 0.002Leader-like |
| 153 | XLOC_006986 | linc-mycb_1             | 3.7708942  | 0.366 | 0.634 | 0Leader-like     |
| 154 | XLOC_000368 | linc-loc557250_1        | 3.78887004 | 0.002 | 0.998 | 0Leader-like     |
| 155 | XLOC_004651 | linc-loc567622_1        | 3.7900788  | 0.014 | 0.986 | 0Leader-like     |
| 156 | XLOC_000713 | linc-fat1_1             | 3.7997229  | 0.358 | 0.596 | 0.046Leader-like |
| 157 | XLOC_011070 | linc-gcat_1             | 3.8507782  | 0.088 | 0.908 | 0.004Leader-like |
| 158 | XLOC_005682 | linc-necab2_1           | 3.971953   | 0     | 1     | 0Leader-like     |
| 159 | XLOC_009881 | linc-zgc:112481_1       | 4.2655424  | 0     | 1     | 0Leader-like     |
| 160 | XLOC_004231 | linc-slc6a4a_1          | 4.283763   | 0.038 | 0.962 | 0Leader-like     |
| 161 | XLOC_011653 | linc-zgc:165627_2_1     | 4.427921   | 0.022 | 0.978 | 0Leader-like     |
| 162 | XLOC_004000 | linc-loc567610_1        | 4.6684893  | 0.148 | 0.852 | 0Leader-like     |
| 163 | XLOC_008915 | linc-si:dkey-15h8.11_1  | 4.7044754  | 0.016 | 0.984 | 0Leader-like     |
| 164 | XLOC_014264 | linc-dync1li2_1         | 4.7790093  | 0.112 | 0.888 | 0Leader-like     |
| 165 | XLOC_011616 | linc-metrl1_1           | 4.8360017  | 0.066 | 0.922 | 0.012Leader-like |
| 166 | XLOC_011332 | linc-loc798482_1        | 5.2636401  | 0.08  | 0.892 | 0.028Leader-like |
| 167 | XLOC_005692 | linc-nr2f2_3            | 5.3382788  | 0.056 | 0.944 | 0Leader-like     |
| 168 | XLOC_011718 | linc-loc556392_2        | 5.4074581  | 0     | 1     | 0Leader-like     |
| 169 | XLOC_012707 | linc-zgc:194800_1       | 5.4584575  | 0.006 | 0.994 | 0Leader-like     |
| 170 | XLOC_009134 | linc-si:ch73-197b13.2_1 | 5.53824938 | 0.218 | 0.774 | 0.008Leader-like |
| 171 | XLOC_012287 | linc-loc100331680_2_1   | 5.6273433  | 0.054 | 0.946 | 0Leader-like     |
| 172 | XLOC_009492 | linc-rnd1_1             | 5.9758775  | 0     | 1     | 0Leader-like     |
| 173 | XLOC_009777 | linc-zgc:194282_1       | 6.0856457  | 0.152 | 0.846 | 0.002Leader-like |
| 174 | XLOC_001483 | linc-nrip1b_1           | 6.382829   | 0.4   | 0.6   | 0Leader-like     |
| 175 | XLOC_005409 | linc-birc6(megamind)_1  | 6.45109302 | 0.036 | 0.958 | 0.006Leader-like |
| 176 | XLOC_010128 | linc-mmp16_(3_of_3)_1   | 7.0057539  | 0.004 | 0.996 | 0Leader-like     |
| 177 | XLOC_012759 | linc-zcchc8_1           | 7.103338   | 0.002 | 0.998 | 0Leader-like     |
| 178 | XLOC_006561 | linc-tra2a_1            | 7.1954571  | 0.112 | 0.888 | 0Leader-like     |
| 179 | XLOC_004549 | linc-mms22l_1           | 7.4377846  | 0.06  | 0.94  | 0Leader-like     |
| 180 | XLOC_014755 | linc-cyb5b_2            | 7.4858711  | 0.004 | 0.996 | 0Leader-like     |
| 181 | XLOC_015354 | linc-si:dkey-20d21.7_1  | 7.621274   | 0.01  | 0.99  | 0Leader-like     |
| 182 | XLOC_005747 | linc-tbcb_1             | 7.6814114  | 0.024 | 0.976 | 0Leader-like     |
| 183 | XLOC_002271 | linc-si:busm1-64d20.2_1 | 7.8112975  | 0     | 1     | 0Leader-like     |
| 184 | XLOC_002250 | linc-znf646_(1_of_2)_1  | 7.976522   | 0.006 | 0.992 | 0.002Leader-like |
| 185 | XLOC_004222 | linc-tbx2b_1            | 8.121872   | 0.006 | 0.992 | 0.002Leader-like |
| 186 | XLOC_006039 | linc-si:dkey-223n17.1_1 | 8.126586   | 0.11  | 0.89  | 0Leader-like     |
| 187 | XLOC_000734 | linc-loc797069_1        | 8.16756377 | 0.014 | 0.986 | 0Leader-like     |
| 188 | XLOC_003504 | linc-msxe_1             | 8.17955    | 0     | 1     | 0Leader-like     |
| 189 | XLOC_011493 | linc-tceb2_1            | 8.238291   | 0     | 1     | 0Leader-like     |
| 190 | XLOC_002484 | linc-polr2a_1           | 8.3987409  | 0.484 | 0.516 | 0Leader-like     |
| 191 | XLOC_002910 | linc-klc1_1             | 8.56113    | 0.102 | 0.702 | 0.196Leader-like |
| 192 | XLOC_001771 | linc-abhd6a_1           | 8.6838351  | 0     | 1     | 0Leader-like     |
| 193 | XLOC_012980 | linc-ela3l_1            | 8.8273587  | 0     | 1     | 0Leader-like     |
| 194 | XLOC_008846 | linc-tcf7_1             | 8.868959   | 0.012 | 0.964 | 0.024Leader-like |
| 195 | XLOC_005168 | linc-yth2_1             | 9.0127246  | 0.126 | 0.75  | 0.124Leader-like |
| 196 | XLOC_002298 | linc-pmp22b_2           | 9.014754   | 0     | 1     | 0Leader-like     |
| 197 | XLOC_013970 | linc-ripk3l_1           | 9.05217    | 0.002 | 0.998 | 0Leader-like     |
| 198 | XLOC_002570 | linc-glrx3_1            | 9.101402   | 0.03  | 0.97  | 0Leader-like     |
| 199 | XLOC_013925 | linc-rbl1_1             | 9.229377   | 0.046 | 0.954 | 0Leader-like     |
| 200 | XLOC_010464 | linc-appl2_1            | 9.74238397 | 0.032 | 0.954 | 0.014Leader-like |
| 201 | XLOC_010025 | linc-acad11_1           | 9.80400071 | 0     | 0.514 | 0.486Leader-like |

|     |             |                               |             |       |       |       |             |
|-----|-------------|-------------------------------|-------------|-------|-------|-------|-------------|
| 202 | XLOC_012856 | linc-cabp7_(2_of_2)_2_1       | 10.284507   | 0.002 | 0.996 | 0.002 | Leader-like |
| 203 | XLOC_003547 | linc-foigr_1                  | 10.3623554  | 0     | 1     | 0     | Leader-like |
| 204 | XLOC_001977 | linc-phf2_1                   | 11.0957901  | 0.09  | 0.476 | 0.434 | Leader-like |
| 205 | XLOC_011250 | linc-tex2_2                   | 11.73295763 | 0     | 1     | 0     | Leader-like |
| 206 | XLOC_009071 | linc-si:ch211-226h8.14_2      | 12.50904374 | 0     | 1     | 0     | Leader-like |
| 207 | XLOC_007776 | linc-si:ch211-157m21.1_1      | 12.5311558  | 0.222 | 0.776 | 0.002 | Leader-like |
| 208 | XLOC_005751 | linc-onecut1_1                | 12.78148365 | 0.014 | 0.986 | 0     | Leader-like |
| 209 | XLOC_012051 | linc-si:dkey-14d8.21_1        | 12.911338   | 0     | 1     | 0     | Leader-like |
| 210 | XLOC_000570 | linc-cha_1                    | 13.353664   | 0.004 | 0.996 | 0     | Leader-like |
| 211 | XLOC_000939 | linc-pi4k2a_1                 | 15.071629   | 0.124 | 0.876 | 0     | Leader-like |
| 212 | XLOC_011766 | linc-parp12b_3                | 16.137169   | 0     | 1     | 0     | Leader-like |
| 213 | XLOC_011746 | linc-tnnt2e_1                 | 16.8957872  | 0.008 | 0.982 | 0.01  | Leader-like |
| 214 | XLOC_002051 | linc-abhd6a_2_1               | 17.7802893  | 0     | 1     | 0     | Leader-like |
| 215 | XLOC_004125 | linc-zgc:165596_1             | 19.134362   | 0.002 | 0.996 | 0.002 | Leader-like |
| 216 | XLOC_001478 | linc-msi2a_1                  | 20.16563341 | 0     | 1     | 0     | Leader-like |
| 217 | XLOC_014239 | linc-tnnt3b_1                 | 20.358201   | 0.14  | 0.71  | 0.15  | Leader-like |
| 218 | XLOC_001505 | linc-setd1ba_1                | 20.54288    | 0.146 | 0.854 | 0     | Leader-like |
| 219 | XLOC_009698 | linc-st8sia7.1_2              | 21.0525142  | 0     | 1     | 0     | Leader-like |
| 220 | XLOC_005244 | linc-ahsa11_1                 | 24.14093    | 0.43  | 0.55  | 0.02  | Leader-like |
| 221 | XLOC_006111 | linc-si:dkeyp-113d7.1_1       | 25.825341   | 0.146 | 0.854 | 0     | Leader-like |
| 222 | XLOC_011291 | linc-loc560530_1              | 27.86905    | 0.28  | 0.72  | 0     | Leader-like |
| 223 | XLOC_011765 | linc-zgc:85676_1              | 29.370431   | 0     | 1     | 0     | Leader-like |
| 224 | XLOC_011516 | linc-prr14_2                  | 36.0044799  | 0     | 1     | 0     | Leader-like |
| 225 | XLOC_003485 | linc-loc792560_2              | 39.812166   | 0     | 1     | 0     | Leader-like |
| 226 | XLOC_008603 | linc-zgc:77838_1              | 40.7929     | 0.014 | 0.986 | 0     | Leader-like |
| 227 | XLOC_000671 | linc-trlr2_1                  | 42.260931   | 0.002 | 0.994 | 0.004 | Leader-like |
| 228 | XLOC_004479 | linc-zgc:193613_1             | 42.54038419 | 0.172 | 0.748 | 0.08  | Leader-like |
| 229 | XLOC_014382 | linc-btr12_1                  | 44.67733988 | 0.002 | 0.998 | 0     | Leader-like |
| 230 | XLOC_011378 | linc-lasp1_1                  | 47.6669808  | 0.048 | 0.948 | 0.004 | Leader-like |
| 231 | XLOC_001770 | linc-abhd6a_3_1               | 48.331678   | 0     | 0.996 | 0.004 | Leader-like |
| 232 | XLOC_007387 | linc-zgc:153633_2             | 52.42374    | 0.002 | 0.998 | 0     | Leader-like |
| 233 | XLOC_014992 | linc-prkar2aa_1               | 65.01295    | 0.004 | 0.996 | 0     | Leader-like |
| 234 | XLOC_015559 | linc-st6gal2_1                | 72.15527    | 0     | 0.5   | 0.5   | Leader-like |
| 235 | XLOC_013088 | linc-slc12a9_1                | 72.985256   | 0     | 1     | 0     | Leader-like |
| 236 | XLOC_015210 | linc-cxxc11_1                 | 78.25358    | 0.004 | 0.996 | 0     | Leader-like |
| 237 | XLOC_002518 | linc-cdkrap3_1                | 81.39735    | 0     | 0.998 | 0.002 | Leader-like |
| 238 | XLOC_013766 | linc-utp6_1                   | 85.46086    | 0.008 | 0.992 | 0     | Leader-like |
| 239 | XLOC_000904 | linc-srd5a2a_1                | 85.59893    | 0     | 1     | 0     | Leader-like |
| 240 | XLOC_000512 | linc-si:dkey-28b4.5_1         | 87.78311    | 0     | 1     | 0     | Leader-like |
| 241 | XLOC_004485 | linc-q58ei7_danre_1           | 107.29192   | 0     | 1     | 0     | Leader-like |
| 242 | XLOC_011117 | linc-loc100003902_1           | 119.93541   | 0     | 1     | 0     | Leader-like |
| 243 | XLOC_005956 | linc-chd2_2                   | 150.2576    | 0.002 | 0.998 | 0     | Leader-like |
| 244 | XLOC_016003 | linc-si:dkey-100n23.5_1       | 162.16603   | 0.012 | 0.982 | 0.006 | Leader-like |
| 245 | XLOC_007068 | linc-itgb1b.2_1               | 190.37307   | 0.326 | 0.674 | 0     | Leader-like |
| 246 | XLOC_015086 | linc-gck_1                    | 819.66549   | 0.002 | 0.998 | 0     | Leader-like |
| 247 | XLOC_003759 | linc-loc100330612_2(malat1)_1 | 1078.04323  | 0.252 | 0.748 | 0     | Leader-like |
| 248 | XLOC_009912 | linc-fbxo25_3                 | 1.2429091   | 0.062 | 0.184 | 0.754 | Coding      |
| 249 | XLOC_001633 | linc-zgc:55741_1              | 1.3839385   | 0     | 0.132 | 0.868 | Coding      |
| 250 | XLOC_014437 | linc-zgc:113057_2_1           | 1.4475758   | 0.016 | 0.246 | 0.738 | Coding      |
| 251 | XLOC_001360 | linc-loc100329566_1           | 1.69370492  | 0.012 | 0.12  | 0.868 | Coding      |
| 252 | XLOC_012288 | linc-loc100331680_1           | 1.7681492   | 0.004 | 0.38  | 0.616 | Coding      |
| 253 | XLOC_015780 | linc-hdac4_3                  | 1.8525518   | 0.026 | 0.286 | 0.688 | Coding      |
| 254 | XLOC_008766 | linc-phka1_(1_of_2)_1         | 1.94586989  | 0.174 | 0.256 | 0.57  | Coding      |
| 255 | XLOC_003469 | linc-zgc:56548_1              | 1.94654139  | 0     | 0.122 | 0.878 | Coding      |
| 256 | XLOC_007572 | linc-dhcr24_1                 | 1.9996613   | 0.008 | 0.402 | 0.59  | Coding      |

|     |             |                         |             |       |       |             |
|-----|-------------|-------------------------|-------------|-------|-------|-------------|
| 257 | XLOC_012123 | linc-si:dkeyp-81f3.3_1  | 2.02537767  | 0     | 0.198 | 0.802Coding |
| 258 | XLOC_001735 | linc-zgc:110815_1       | 2.1766556   | 0     | 0.088 | 0.912Coding |
| 259 | XLOC_008565 | linc-np_001108140.1_1   | 2.20118128  | 0.084 | 0.18  | 0.736Coding |
| 260 | XLOC_007690 | linc-btbd7_1            | 2.47049997  | 0.122 | 0.334 | 0.544Coding |
| 261 | XLOC_004898 | linc-pou3f1_1           | 2.5954752   | 0.098 | 0.346 | 0.556Coding |
| 262 | XLOC_013522 | linc-im:6904866_2       | 2.92963897  | 0.002 | 0.014 | 0.984Coding |
| 263 | XLOC_010106 | linc-loc797436_1        | 3.0616151   | 0     | 0.358 | 0.642Coding |
| 264 | XLOC_010005 | linc-trpc1_1            | 3.107419    | 0     | 0.022 | 0.978Coding |
| 265 | XLOC_010452 | linc-zgc:172183_1       | 3.2881183   | 0.22  | 0.362 | 0.418Coding |
| 266 | XLOC_010759 | linc-zgc:162634_1       | 3.293935    | 0.018 | 0.124 | 0.858Coding |
| 267 | XLOC_002955 | linc-loc556339_1        | 3.5751882   | 0.002 | 0.024 | 0.974Coding |
| 268 | XLOC_005166 | linc-rps6ka1_1          | 3.623965346 | 0.298 | 0.118 | 0.584Coding |
| 269 | XLOC_013133 | linc-zgc:100930_1       | 3.719213    | 0     | 0.02  | 0.98Coding  |
| 270 | XLOC_014499 | linc-zgc:194252_1       | 3.7603304   | 0.064 | 0.122 | 0.814Coding |
| 271 | XLOC_013000 | linc-zgc:162952_1       | 3.7883439   | 0.034 | 0.132 | 0.834Coding |
| 272 | XLOC_015825 | linc-si:ch73-250a16.3_1 | 3.9810773   | 0.122 | 0.034 | 0.844Coding |
| 273 | XLOC_008485 | linc-zgc:91985_1        | 4.11772424  | 0.01  | 0.256 | 0.734Coding |
| 274 | XLOC_010255 | linc-cul1b_1            | 4.219307    | 0.018 | 0.232 | 0.75Coding  |
| 275 | XLOC_004645 | linc-efhb_1             | 4.2470647   | 0.002 | 0.208 | 0.79Coding  |
| 276 | XLOC_009476 | linc-acy6_(1_of_2)_1    | 4.2742664   | 0.022 | 0.336 | 0.642Coding |
| 277 | XLOC_007849 | linc-ipo13_1            | 4.46053402  | 0.054 | 0.326 | 0.62Coding  |
| 278 | XLOC_007557 | linc-wu:fa18f11_1       | 4.498509    | 0     | 0.13  | 0.87Coding  |
| 279 | XLOC_012498 | linc-thy1_1             | 4.674566    | 0.08  | 0.042 | 0.878Coding |
| 280 | XLOC_004139 | linc-fkrp_2             | 4.774505    | 0     | 0.002 | 0.998Coding |
| 281 | XLOC_012808 | linc-zgc:73070_2_1      | 4.977169    | 0.12  | 0.184 | 0.696Coding |
| 282 | XLOC_014065 | linc-ecsit_1            | 4.990663    | 0     | 0     | 1Coding     |
| 283 | XLOC_012931 | linc-zgc:158409_1       | 5.048879    | 0.236 | 0.222 | 0.542Coding |
| 284 | XLOC_005333 | linc-loc566404_1        | 5.1341619   | 0.004 | 0.066 | 0.93Coding  |
| 285 | XLOC_013682 | linc-ptprf_1            | 5.2182169   | 0.04  | 0.074 | 0.886Coding |
| 286 | XLOC_015589 | linc-si:dkey-7j20.1_1   | 5.3715667   | 0     | 0.012 | 0.988Coding |
| 287 | XLOC_005141 | linc-rpl13a_3           | 5.539431    | 0.018 | 0.452 | 0.53Coding  |
| 288 | XLOC_002869 | linc-c6orf105_1         | 5.5555046   | 0.22  | 0.146 | 0.634Coding |
| 289 | XLOC_009215 | linc-loc100334801_1     | 5.5994916   | 0.014 | 0.174 | 0.812Coding |
| 290 | XLOC_005101 | linc-eed_1              | 5.90139788  | 0.01  | 0.44  | 0.55Coding  |
| 291 | XLOC_002573 | linc-loc100149344_1     | 5.907448    | 0.084 | 0.03  | 0.886Coding |
| 292 | XLOC_014085 | linc-wu:fi38e01_1       | 6.042249    | 0.002 | 0.042 | 0.956Coding |
| 293 | XLOC_010020 | linc-ankha_1            | 6.11170731  | 0     | 0.052 | 0.948Coding |
| 294 | XLOC_013628 | linc-gnai2_3            | 6.358318    | 0     | 0.064 | 0.936Coding |
| 295 | XLOC_004769 | linc-crabp2a_2          | 6.5538937   | 0     | 0     | 1Coding     |
| 296 | XLOC_004288 | linc-zgc:153310_1       | 6.5650248   | 0     | 0.014 | 0.986Coding |
| 297 | XLOC_004612 | linc-slc4a7_1           | 6.6407894   | 0     | 0.458 | 0.542Coding |
| 298 | XLOC_003608 | linc-aldob_1            | 6.8946931   | 0     | 0.002 | 0.998Coding |
| 299 | XLOC_002774 | linc-slc24a3_1          | 7.035924    | 0.01  | 0.024 | 0.966Coding |
| 300 | XLOC_001368 | linc-lox12a_1           | 7.11943686  | 0.106 | 0.108 | 0.786Coding |
| 301 | XLOC_000419 | linc-anp32b_1           | 7.442346    | 0.106 | 0.026 | 0.868Coding |
| 302 | XLOC_010502 | linc-fa2h_1             | 7.56618303  | 0.056 | 0.058 | 0.886Coding |
| 303 | XLOC_009439 | linc-im:7141335_1       | 7.588955    | 0.034 | 0.152 | 0.814Coding |
| 304 | XLOC_012429 | linc-plp1b_2            | 7.929681    | 0     | 0     | 1Coding     |
| 305 | XLOC_004055 | linc-zgc:110692_1       | 8.097765    | 0     | 0.116 | 0.884Coding |
| 306 | XLOC_004791 | linc-chn2_1             | 8.1138016   | 0.284 | 0.138 | 0.578Coding |
| 307 | XLOC_012770 | linc-np_001161936.1_1   | 8.3155996   | 0     | 0.02  | 0.98Coding  |
| 308 | XLOC_013619 | linc-eif6_3             | 8.514001    | 0.002 | 0.254 | 0.744Coding |
| 309 | XLOC_004430 | linc-loc793249_1        | 8.539327    | 0.13  | 0.04  | 0.83Coding  |
| 310 | XLOC_004974 | linc-zgc:100811_1       | 8.930291    | 0.004 | 0.014 | 0.982Coding |
| 311 | XLOC_012299 | linc-zgc:92791_1        | 9.98208     | 0.006 | 0.016 | 0.978Coding |

|     |             |                        |             |       |       |             |
|-----|-------------|------------------------|-------------|-------|-------|-------------|
| 312 | XLOC_005030 | linc-plcb2_1           | 10.06508774 | 0.014 | 0.454 | 0.532Coding |
| 313 | XLOC_004684 | linc-zgc:76869_1       | 10.216932   | 0.024 | 0.01  | 0.966Coding |
| 314 | XLOC_015671 | linc-zgc:162396_1      | 10.411151   | 0.134 | 0.384 | 0.482Coding |
| 315 | XLOC_004312 | linc-ftr76_1           | 11.241148   | 0     | 0.012 | 0.988Coding |
| 316 | XLOC_013145 | linc-loc794173_1       | 11.411461   | 0     | 0.104 | 0.896Coding |
| 317 | XLOC_011887 | linc-zgc:101896_1      | 12.420488   | 0     | 0     | 1Coding     |
| 318 | XLOC_008691 | linc-lmbrd2b_1         | 12.564628   | 0     | 0     | 1Coding     |
| 319 | XLOC_005611 | linc-zgc:112052_1      | 12.625688   | 0     | 0     | 1Coding     |
| 320 | XLOC_012302 | linc-zgc:162948_1      | 12.935145   | 0     | 0.012 | 0.988Coding |
| 321 | XLOC_004137 | linc-fkrp_1            | 13.01258    | 0     | 0     | 1Coding     |
| 322 | XLOC_005836 | linc-si:dkey-81n9.1_1  | 13.202504   | 0.134 | 0.24  | 0.626Coding |
| 323 | XLOC_011035 | linc-copz2_1           | 15.140146   | 0.002 | 0.126 | 0.872Coding |
| 324 | XLOC_002512 | linc-tmern106a_1       | 15.758029   | 0.018 | 0.24  | 0.742Coding |
| 325 | XLOC_010952 | linc-zgc:77060_1       | 15.763576   | 0     | 0     | 1Coding     |
| 326 | XLOC_008276 | linc-zgc:171220_2      | 15.868308   | 0     | 0.032 | 0.968Coding |
| 327 | XLOC_013793 | linc-cep63_1           | 15.88324989 | 0     | 0.002 | 0.998Coding |
| 328 | XLOC_009694 | linc-wu:fc32f04_1      | 16.254292   | 0     | 0     | 1Coding     |
| 329 | XLOC_010363 | linc-pus3_1            | 17.190638   | 0     | 0     | 1Coding     |
| 330 | XLOC_007445 | linc-card8_(1_of_2)_1  | 17.2909484  | 0     | 0.048 | 0.952Coding |
| 331 | XLOC_012702 | linc-nup88_1           | 17.612015   | 0.036 | 0.018 | 0.946Coding |
| 332 | XLOC_007380 | linc-pex19_1           | 17.666878   | 0     | 0.01  | 0.99Coding  |
| 333 | XLOC_014845 | linc-pim1_1            | 18.2586166  | 0.01  | 0.464 | 0.526Coding |
| 334 | XLOC_004963 | linc-gapdhs_1          | 18.588045   | 0     | 0.004 | 0.996Coding |
| 335 | XLOC_011555 | linc-rogdi_1           | 19.046163   | 0.004 | 0.018 | 0.978Coding |
| 336 | XLOC_004721 | linc-nt5c3_1           | 19.724305   | 0     | 0.002 | 0.998Coding |
| 337 | XLOC_009198 | linc-si:rp71-36a1.3_1  | 21.163223   | 0     | 0     | 1Coding     |
| 338 | XLOC_009735 | linc-smpd2_1           | 21.948403   | 0     | 0     | 1Coding     |
| 339 | XLOC_009183 | linc-fbn2b_1           | 22.3075521  | 0.028 | 0.464 | 0.508Coding |
| 340 | XLOC_013498 | linc-efcab7_1          | 22.772261   | 0     | 0.056 | 0.944Coding |
| 341 | XLOC_009865 | linc-tardbp1_1         | 22.8476847  | 0     | 0.038 | 0.962Coding |
| 342 | XLOC_014450 | linc-zgc:112305_1      | 23.44648374 | 0.4   | 0.04  | 0.56Coding  |
| 343 | XLOC_006602 | linc-ppp1r11_1         | 28.245812   | 0.096 | 0.058 | 0.846Coding |
| 344 | XLOC_010870 | linc-q566t3_danre_1    | 29.40319    | 0.02  | 0.092 | 0.888Coding |
| 345 | XLOC_004947 | linc-wu:fb12e11_1      | 29.5230336  | 0     | 0     | 1Coding     |
| 346 | XLOC_010586 | linc-a0jmg7_danre_2    | 29.5363284  | 0.002 | 0.16  | 0.838Coding |
| 347 | XLOC_004489 | linc-zgc:175096_1      | 29.59002    | 0     | 0     | 1Coding     |
| 348 | XLOC_005418 | linc-spdy_a_1          | 31.28339    | 0     | 0.004 | 0.996Coding |
| 349 | XLOC_008320 | linc-grin1a_1          | 31.5409886  | 0     | 0     | 1Coding     |
| 350 | XLOC_002285 | linc-loc100148088_1    | 31.556168   | 0.102 | 0.102 | 0.796Coding |
| 351 | XLOC_009436 | linc-srsf6a_1          | 32.110646   | 0     | 0.018 | 0.982Coding |
| 352 | XLOC_010677 | linc-fth1b_1           | 32.47451    | 0     | 0.062 | 0.938Coding |
| 353 | XLOC_004691 | linc-adamtsl4_1        | 34.68897    | 0     | 0.004 | 0.996Coding |
| 354 | XLOC_012003 | linc-msgn1_1           | 37.90861    | 0.002 | 0.032 | 0.966Coding |
| 355 | XLOC_006751 | linc-loc799904_1       | 38.6036092  | 0     | 0     | 1Coding     |
| 356 | XLOC_003831 | linc-sirt2_1           | 40.89036    | 0     | 0     | 1Coding     |
| 357 | XLOC_012907 | linc-slc6a4b_1         | 42.707195   | 0.234 | 0.108 | 0.658Coding |
| 358 | XLOC_004620 | linc-zfpm2a_6          | 43.28835    | 0     | 0     | 1Coding     |
| 359 | XLOC_010043 | linc-loc560369_1       | 43.648879   | 0.024 | 0.028 | 0.948Coding |
| 360 | XLOC_003564 | linc-tmern129_1        | 45.187472   | 0     | 0     | 1Coding     |
| 361 | XLOC_009497 | linc-pnpla8_(2_of_2)_1 | 47.61853    | 0     | 0.006 | 0.994Coding |
| 362 | XLOC_009131 | linc-psmd1_1           | 48.7608     | 0     | 0.002 | 0.998Coding |
| 363 | XLOC_006552 | linc-sb:cb649_1        | 49.641362   | 0     | 0.184 | 0.816Coding |
| 364 | XLOC_011369 | linc-zgc:66474_1       | 51.0958     | 0     | 0     | 1Coding     |
| 365 | XLOC_009506 | linc-pard6b_1          | 52.80564    | 0     | 0     | 1Coding     |
| 366 | XLOC_011304 | linc-srebf2_1          | 53.99538    | 0     | 0     | 1Coding     |

|     |             |                          |             |       |       |             |
|-----|-------------|--------------------------|-------------|-------|-------|-------------|
| 367 | XLOC_001453 | linc-por_1               | 55.88511    | 0     | 0.002 | 0.998Coding |
| 368 | XLOC_005511 | linc-ktn1_1              | 59.671847   | 0.018 | 0.014 | 0.968Coding |
| 369 | XLOC_004486 | linc-try_1               | 60.66739    | 0     | 0     | 1Coding     |
| 370 | XLOC_013354 | linc-sec23b_1            | 60.93178    | 0.016 | 0.22  | 0.764Coding |
| 371 | XLOC_012587 | linc-gc3_2_1             | 63.456301   | 0     | 0     | 1Coding     |
| 372 | XLOC_001407 | linc-zgc:110695_2        | 63.88561    | 0.006 | 0.408 | 0.586Coding |
| 373 | XLOC_006862 | linc-xrn1_1              | 64.77411    | 0     | 0     | 1Coding     |
| 374 | XLOC_013540 | linc-zgc:77517_3         | 73.36502    | 0.01  | 0.04  | 0.95Coding  |
| 375 | XLOC_009527 | linc-her4.2_1            | 75.076073   | 0     | 0     | 1Coding     |
| 376 | XLOC_009213 | linc-loc100334996_1      | 80.89063    | 0.088 | 0.018 | 0.894Coding |
| 377 | XLOC_014976 | linc-suv39h1b_1          | 81.62687    | 0     | 0.1   | 0.9Coding   |
| 378 | XLOC_000874 | linc-agpat3_1            | 83.9615377  | 0.28  | 0.056 | 0.664Coding |
| 379 | XLOC_003606 | linc-q7syn2_danre_1      | 85.4230492  | 0     | 0     | 1Coding     |
| 380 | XLOC_012737 | linc-gsnb_1              | 86.04136    | 0     | 0     | 1Coding     |
| 381 | XLOC_013590 | linc-im:7160159_1        | 89.174034   | 0     | 0     | 1Coding     |
| 382 | XLOC_003438 | linc-zgc:171223_1        | 91.3504259  | 0     | 0.004 | 0.996Coding |
| 383 | XLOC_005830 | linc-ugt5f1_1            | 95.8689351  | 0     | 0     | 1Coding     |
| 384 | XLOC_005636 | linc-tph2_1              | 96.50082    | 0     | 0.002 | 0.998Coding |
| 385 | XLOC_013210 | linc-prpf4_1             | 96.66392    | 0     | 0     | 1Coding     |
| 386 | XLOC_010961 | linc-ccdc101_1           | 97.3931103  | 0     | 0.006 | 0.994Coding |
| 387 | XLOC_002063 | linc-tk1_1               | 101.26672   | 0     | 0     | 1Coding     |
| 388 | XLOC_008217 | linc-ipo13_2_1           | 102.6915    | 0     | 0     | 1Coding     |
| 389 | XLOC_000642 | linc-gart_1              | 103.11266   | 0     | 0     | 1Coding     |
| 390 | XLOC_002504 | linc-zgc:153947_1        | 104.8629    | 0     | 0.002 | 0.998Coding |
| 391 | XLOC_009999 | linc-cyb5a_2             | 106.9893288 | 0     | 0     | 1Coding     |
| 392 | XLOC_008381 | linc-loc564655_1         | 109.04635   | 0     | 0     | 1Coding     |
| 393 | XLOC_016008 | linc-acp6_1              | 112.43539   | 0     | 0.002 | 0.998Coding |
| 394 | XLOC_011382 | linc-rpl19_1             | 124.748987  | 0     | 0     | 1Coding     |
| 395 | XLOC_004918 | linc-zgc:77056_2         | 130.2511    | 0     | 0.004 | 0.996Coding |
| 396 | XLOC_003569 | linc-zgc:172056_1        | 132.89883   | 0     | 0     | 1Coding     |
| 397 | XLOC_014516 | linc-wu:fi38e01_3_1      | 146.65259   | 0     | 0     | 1Coding     |
| 398 | XLOC_015274 | linc-si:ch211-150o23.3_1 | 147.14173   | 0     | 0     | 1Coding     |
| 399 | XLOC_000399 | linc-loc557812_1         | 154.729127  | 0     | 0.012 | 0.988Coding |
| 400 | XLOC_011739 | linc-foxp2_2_1           | 155.12436   | 0.004 | 0.002 | 0.994Coding |
| 401 | XLOC_012486 | linc-vamp8_2             | 162.57052   | 0.022 | 0.232 | 0.746Coding |
| 402 | XLOC_015912 | linc-gtf2f2b_1           | 180.276774  | 0.05  | 0.234 | 0.716Coding |
| 403 | XLOC_005086 | linc-zgc:158367_1        | 189.59781   | 0     | 0     | 1Coding     |
| 404 | XLOC_004043 | linc-zgc:77147_1         | 201.9026    | 0.134 | 0.168 | 0.698Coding |
| 405 | XLOC_005417 | linc-loc559575_1         | 213.53447   | 0     | 0     | 1Coding     |
| 406 | XLOC_014836 | linc-mecp2_1             | 218.719507  | 0     | 0     | 1Coding     |
| 407 | XLOC_014093 | linc-mettl3_1            | 221.2762866 | 0.024 | 0.01  | 0.966Coding |
| 408 | XLOC_006795 | linc-dlg1_1              | 232.6671    | 0     | 0     | 1Coding     |
| 409 | XLOC_009619 | linc-fbxo25_2            | 235.72162   | 0     | 0     | 1Coding     |
| 410 | XLOC_008477 | linc-cd74_1              | 244.4372    | 0     | 0     | 1Coding     |
| 411 | XLOC_012147 | linc-si:dkeyp-38g8.5_1   | 260.98263   | 0     | 0.002 | 0.998Coding |
| 412 | XLOC_014507 | linc-loc563681_1         | 263.4642    | 0     | 0     | 1Coding     |
| 413 | XLOC_009904 | linc-bin2a_1             | 268.72789   | 0.096 | 0.062 | 0.842Coding |
| 414 | XLOC_014525 | linc-cldn7a_1            | 293.82669   | 0     | 0.01  | 0.99Coding  |
| 415 | XLOC_002429 | linc-zgc:152954_1        | 294.4391916 | 0     | 0     | 1Coding     |
| 416 | XLOC_012971 | linc-zgc:112985_1        | 294.81448   | 0     | 0     | 1Coding     |
| 417 | XLOC_009422 | linc-zgc:113423_1        | 324.41439   | 0     | 0     | 1Coding     |
| 418 | XLOC_011453 | linc-zgc:153240_1        | 326.6791    | 0     | 0.002 | 0.998Coding |
| 419 | XLOC_015548 | linc-loc100334485_1      | 355.254066  | 0     | 0     | 1Coding     |
| 420 | XLOC_010132 | linc-ca2_1               | 382.2282    | 0     | 0     | 1Coding     |
| 421 | XLOC_003435 | linc-csnk1a1_2           | 409.820252  | 0     | 0     | 1Coding     |

|     |             |                     |             |       |       |       |        |
|-----|-------------|---------------------|-------------|-------|-------|-------|--------|
| 422 | XLOC_000733 | linc-tmcm192_1      | 447.1629167 | 0     | 0.018 | 0.982 | Coding |
| 423 | XLOC_003762 | linc-a2ruy8_danre_1 | 455.9918    | 0     | 0     | 1     | Coding |
| 424 | XLOC_012738 | linc-rab14_2        | 459.63011   | 0     | 0     | 1     | Coding |
| 425 | XLOC_011257 | linc-zgc:165627_1   | 509.77857   | 0.018 | 0.358 | 0.624 | Coding |
| 426 | XLOC_007863 | linc-mpp5b_1        | 529.64278   | 0     | 0     | 1     | Coding |
| 427 | XLOC_012685 | linc-pisd_2         | 537.95144   | 0.028 | 0.062 | 0.91  | Coding |
| 428 | XLOC_004595 | linc-trmt11_2       | 653.14126   | 0     | 0     | 1     | Coding |
| 429 | XLOC_015720 | linc-grtp1b_1       | 657.7823    | 0     | 0     | 1     | Coding |
| 430 | XLOC_012816 | linc-vkorc111_2     | 1209.3079   | 0.006 | 0.052 | 0.942 | Coding |
| 431 | XLOC_011509 | linc-prl_1          | 1481.4208   | 0     | 0     | 1     | Coding |
| 432 | XLOC_012280 | linc-loc100332930_1 | 1586.181162 | 0     | 0     | 1     | Coding |
| 433 | XLOC_008456 | linc-otub11_1       | 2015.3379   | 0     | 0     | 1     | Coding |
| 434 | XLOC_001232 | linc-mipep1_1       | 4004.8405   | 0.07  | 0.07  | 0.86  | Coding |
| 435 | XLOC_004118 | linc-wrb_1          | 4232.682    | 0.068 | 0.046 | 0.886 | Coding |

**Table S4. TOC predictions for lncRNAs from Guttman et al., 2011**

TOC was used to classify proposed zebrafish lncRNAs from Guttman et al., 2011. Listed are the name of the locus (XLOC\_XXX), the transcript identifier and the RNA-Seq based expression level in fragments per kilobase of exon per million fragments mapped (FPKM). For the most coding-like ORF (for predicted coding transcripts) or leader-like ORF (for predicted leader-like or trailer-like transcripts) within a transcript, the list shows the relative frequency of trees that classify that ORF as trailer, leader or coding. Note that this ORF may not necessarily be the longest or the most RPF-dense ORF within the locus. The last column contains the resulting TOC-based classification for the particular transcript. Transcript structures with all associated metadata (chromosome start/end, strand, locus name, isoform name, exon-intron structure) are accessible as GTF files at Gene Expression Omnibus (GEO) (accession number GSE46512).

|    | Locus       | Transcript     | FPKM    | Trailer | Leader | Coding | Prediction   |
|----|-------------|----------------|---------|---------|--------|--------|--------------|
| 1  | XLOC_006913 | linc1477.2_1   | 1.00919 | 0.526   | 0.472  | 0.002  | Trailer-like |
| 2  | XLOC_004933 | linc1274.2_1_2 | 1.086   | 0.724   | 0.272  | 0.004  | Trailer-like |
| 3  | XLOC_020832 | linc1390.2_1   | 1.16471 | 1       | 0      | 0      | Trailer-like |
| 4  | XLOC_007846 | linc1610.2_1   | 1.21595 | 0.654   | 0.34   | 0.006  | Trailer-like |
| 5  | XLOC_004185 | linc1453.2_1   | 1.26173 | 1       | 0      | 0      | Trailer-like |
| 6  | XLOC_021035 | linc1399.2_1_2 | 1.31879 | 0.584   | 0.416  | 0      | Trailer-like |
| 7  | XLOC_001932 | linc1244.2_1   | 1.41468 | 0.688   | 0.312  | 0      | Trailer-like |
| 8  | XLOC_005788 | linc1284.2_1   | 1.41661 | 0.682   | 0.318  | 0      | Trailer-like |
| 9  | XLOC_005330 | linc1470.2_1   | 1.49727 | 0.59    | 0.388  | 0.022  | Trailer-like |
| 10 | XLOC_002471 | linc1599.2_1   | 1.64832 | 0.596   | 0.404  | 0      | Trailer-like |
| 11 | XLOC_006614 | linc1607.2_1   | 1.7777  | 0.664   | 0.336  | 0      | Trailer-like |
| 12 | XLOC_021168 | linc1401.2_1   | 2.01592 | 0.564   | 0.436  | 0      | Trailer-like |
| 13 | XLOC_016788 | linc1629.2_1_2 | 2.14976 | 0.876   | 0.124  | 0      | Trailer-like |
| 14 | XLOC_009895 | linc1313.2_1   | 2.15483 | 0.954   | 0.046  | 0      | Trailer-like |
| 15 | XLOC_016148 | linc1625.2_1_2 | 2.21079 | 0.726   | 0.274  | 0      | Trailer-like |
| 16 | XLOC_000341 | linc1418.2_1   | 2.28963 | 0.688   | 0.312  | 0      | Trailer-like |
| 17 | XLOC_004750 | linc1270.2_1_2 | 2.54777 | 0.712   | 0.288  | 0      | Trailer-like |
| 18 | XLOC_003000 | linc1449.2_1   | 2.65834 | 0.82    | 0.18   | 0      | Trailer-like |
| 19 | XLOC_009028 | linc1306.2_1   | 2.67207 | 0.992   | 0.008  | 0      | Trailer-like |
| 20 | XLOC_019525 | linc1631.2_1   | 2.79886 | 0.902   | 0.098  | 0      | Trailer-like |
| 21 | XLOC_017706 | linc1369.2_1   | 3.0481  | 0.684   | 0.316  | 0      | Trailer-like |
| 22 | XLOC_003730 | linc1262.2_1   | 3.87627 | 0.548   | 0.444  | 0.008  | Trailer-like |
| 23 | XLOC_013660 | linc1335.2_2   | 4.48857 | 0.612   | 0.388  | 0      | Trailer-like |
| 24 | XLOC_019501 | linc1385.2_1   | 4.63649 | 0.706   | 0.294  | 0      | Trailer-like |
| 25 | XLOC_020636 | linc1587.2_1_2 | 4.98752 | 1       | 0      | 0      | Trailer-like |
| 26 | XLOC_017027 | linc1552.2_1   | 6.3737  | 0.882   | 0.118  | 0      | Trailer-like |
| 27 | XLOC_002054 | linc1246.2_2   | 6.96284 | 0.898   | 0.102  | 0      | Trailer-like |
| 28 | XLOC_019944 | linc1388.2_1   | 8.41961 | 0.796   | 0.194  | 0.01   | Trailer-like |
| 29 | XLOC_011410 | linc1510.2_1   | 11.4172 | 0.824   | 0.176  | 0      | Trailer-like |
| 30 | XLOC_010491 | linc1317.2_1_2 | 12.5055 | 0.694   | 0.306  | 0      | Trailer-like |
| 31 | XLOC_004501 | linc1458.2_4   | 12.5275 | 1       | 0      | 0      | Trailer-like |
| 32 | XLOC_003273 | linc1256.2_1   | 14.4789 | 0.954   | 0.046  | 0      | Trailer-like |
| 33 | XLOC_023248 | linc1410.2_1   | 1.01226 | 0.004   | 0.996  | 0      | Leader-like  |
| 34 | XLOC_008854 | linc1494.2_1   | 1.02667 | 0.002   | 0.998  | 0      | Leader-like  |
| 35 | XLOC_005373 | linc1471.2_1   | 1.03988 | 0.01    | 0.99   | 0      | Leader-like  |

|    |             |                |         |       |       |       |             |
|----|-------------|----------------|---------|-------|-------|-------|-------------|
| 36 | XLOC_004265 | linc1454.2_1   | 1.04719 | 0.122 | 0.878 | 0     | Leader-like |
| 37 | XLOC_020467 | linc1398.2_1   | 1.05052 | 0.106 | 0.894 | 0     | Leader-like |
| 38 | XLOC_009483 | linc1311.2_1   | 1.07007 | 0.138 | 0.86  | 0.002 | Leader-like |
| 39 | XLOC_007104 | linc1482.2_1   | 1.08783 | 0.268 | 0.732 | 0     | Leader-like |
| 40 | XLOC_023393 | linc1411.2_1   | 1.13019 | 0.018 | 0.982 | 0     | Leader-like |
| 41 | XLOC_018518 | linc1572.2_1   | 1.13166 | 0.39  | 0.61  | 0     | Leader-like |
| 42 | XLOC_003533 | linc1261.2_1_2 | 1.13801 | 0.004 | 0.996 | 0     | Leader-like |
| 43 | XLOC_008976 | linc1304.2_1   | 1.22201 | 0.142 | 0.858 | 0     | Leader-like |
| 44 | XLOC_009462 | linc1310.2_1   | 1.23691 | 0.278 | 0.722 | 0     | Leader-like |
| 45 | XLOC_002995 | linc1603.2_1   | 1.24501 | 0     | 1     | 0     | Leader-like |
| 46 | XLOC_022651 | linc1592.2_1   | 1.24775 | 0.37  | 0.63  | 0     | Leader-like |
| 47 | XLOC_021110 | linc1400.2_1   | 1.25078 | 0.078 | 0.922 | 0     | Leader-like |
| 48 | XLOC_020556 | linc1634.2_1   | 1.288   | 0.026 | 0.974 | 0     | Leader-like |
| 49 | XLOC_000789 | linc1231.2_1   | 1.30058 | 0.018 | 0.982 | 0     | Leader-like |
| 50 | XLOC_017142 | linc1555.2_1   | 1.30796 | 0.154 | 0.842 | 0.004 | Leader-like |
| 51 | XLOC_008097 | linc1300.2_1   | 1.32481 | 0     | 1     | 0     | Leader-like |
| 52 | XLOC_015768 | linc1626.2_1   | 1.36507 | 0.008 | 0.99  | 0.002 | Leader-like |
| 53 | XLOC_000393 | linc1595.2_1   | 1.36518 | 0.02  | 0.98  | 0     | Leader-like |
| 54 | XLOC_010963 | linc1505.2_1   | 1.38277 | 0.05  | 0.95  | 0     | Leader-like |
| 55 | XLOC_000630 | linc1428.2_1   | 1.38726 | 0.32  | 0.68  | 0     | Leader-like |
| 56 | XLOC_000718 | linc1230.2_1   | 1.44403 | 0.344 | 0.656 | 0     | Leader-like |
| 57 | XLOC_017299 | linc1630.2_1   | 1.45104 | 0.394 | 0.606 | 0     | Leader-like |
| 58 | XLOC_003485 | linc1600.2_1   | 1.46676 | 0.052 | 0.948 | 0     | Leader-like |
| 59 | XLOC_001701 | linc1596.2_1   | 1.50535 | 0.114 | 0.886 | 0     | Leader-like |
| 60 | XLOC_011749 | linc1515.2_1   | 1.58538 | 0.036 | 0.964 | 0     | Leader-like |
| 61 | XLOC_014929 | linc1623.2_1   | 1.60846 | 0.15  | 0.85  | 0     | Leader-like |
| 62 | XLOC_001704 | linc1439.2_1   | 1.72639 | 0     | 1     | 0     | Leader-like |
| 63 | XLOC_010390 | linc1503.2_1   | 1.75503 | 0.338 | 0.662 | 0     | Leader-like |
| 64 | XLOC_016957 | linc1549.2_1   | 1.75964 | 0.03  | 0.97  | 0     | Leader-like |
| 65 | XLOC_009903 | linc1615.2_1   | 1.77133 | 0.002 | 0.998 | 0     | Leader-like |
| 66 | XLOC_012162 | linc1618.2_1   | 1.79431 | 0.014 | 0.986 | 0     | Leader-like |
| 67 | XLOC_011861 | linc1319.2_1_2 | 1.79802 | 0.002 | 0.998 | 0     | Leader-like |
| 68 | XLOC_003441 | linc1260.2_1   | 1.79876 | 0.008 | 0.992 | 0     | Leader-like |
| 69 | XLOC_010259 | linc1616.2_1   | 1.84597 | 0     | 1     | 0     | Leader-like |
| 70 | XLOC_022293 | linc1635.2_1   | 1.86268 | 0     | 1     | 0     | Leader-like |
| 71 | XLOC_015785 | linc1627.2_1   | 1.86814 | 0     | 1     | 0     | Leader-like |
| 72 | XLOC_001794 | linc1597.2_1   | 1.91422 | 0.002 | 0.998 | 0     | Leader-like |
| 73 | XLOC_011172 | linc1507.2_1   | 1.92403 | 0.028 | 0.972 | 0     | Leader-like |
| 74 | XLOC_012766 | linc1331.2_3   | 1.94604 | 0     | 1     | 0     | Leader-like |
| 75 | XLOC_006823 | linc1608.2_1_2 | 2.10662 | 0.002 | 0.998 | 0     | Leader-like |
| 76 | XLOC_022490 | linc1405.2_1   | 2.22561 | 0     | 1     | 0     | Leader-like |
| 77 | XLOC_003384 | linc1259.2_3_4 | 2.26626 | 0.016 | 0.984 | 0     | Leader-like |
| 78 | XLOC_017631 | linc1366.2_1   | 2.34296 | 0     | 1     | 0     | Leader-like |
| 79 | XLOC_013461 | linc1334.2_1_2 | 2.36031 | 0.014 | 0.986 | 0     | Leader-like |
| 80 | XLOC_007138 | linc1289.2_2   | 2.41709 | 0.046 | 0.954 | 0     | Leader-like |
| 81 | XLOC_004340 | linc1456.2_1   | 2.43278 | 0.036 | 0.964 | 0     | Leader-like |
| 82 | XLOC_005747 | linc1282.2_1   | 2.44136 | 0.004 | 0.996 | 0     | Leader-like |
| 83 | XLOC_010005 | linc1316.2_1_2 | 2.49515 | 0.132 | 0.868 | 0     | Leader-like |
| 84 | XLOC_015532 | linc1535.2_1_2 | 2.50887 | 0.162 | 0.838 | 0     | Leader-like |
| 85 | XLOC_016715 | linc1359.2_1_2 | 2.57772 | 0.018 | 0.982 | 0     | Leader-like |
| 86 | XLOC_015568 | linc1536.2_1   | 2.71953 | 0     | 1     | 0     | Leader-like |
| 87 | XLOC_021030 | linc2097.2_1   | 2.77197 | 0.014 | 0.986 | 0     | Leader-like |
| 88 | XLOC_003968 | linc1604.2_1_2 | 2.77267 | 0     | 1     | 0     | Leader-like |
| 89 | XLOC_007429 | linc1293.2_1   | 2.8702  | 0.18  | 0.82  | 0     | Leader-like |
| 90 | XLOC_016634 | linc1628.2_1   | 2.94248 | 0.376 | 0.624 | 0     | Leader-like |



|     |             |                     |         |       |       |                  |
|-----|-------------|---------------------|---------|-------|-------|------------------|
| 91  | XLOC_002698 | linc1601.2_1        | 2.98221 | 0     | 1     | 0Leader-like     |
| 92  | XLOC_007948 | linc1487.2_1        | 3.00082 | 0     | 1     | 0Leader-like     |
| 93  | XLOC_003349 | linc1258.2_1        | 3.00971 | 0.004 | 0.996 | 0Leader-like     |
| 94  | XLOC_006663 | linc1288.2_1        | 3.11753 | 0.202 | 0.798 | 0Leader-like     |
| 95  | XLOC_017210 | linc1557.2_1        | 3.14584 | 0.018 | 0.982 | 0Leader-like     |
| 96  | XLOC_002239 | linc1253.2_1_2      | 3.17477 | 0.062 | 0.938 | 0Leader-like     |
| 97  | XLOC_002193 | linc1251.2_1        | 3.25195 | 0.026 | 0.974 | 0Leader-like     |
| 98  | XLOC_013858 | linc1621.2_1_2      | 3.26227 | 0.014 | 0.986 | 0Leader-like     |
| 99  | XLOC_006861 | linc1476.2_1        | 3.32421 | 0.102 | 0.898 | 0Leader-like     |
| 100 | XLOC_002029 | linc1245.2_2        | 3.37576 | 0.394 | 0.606 | 0Leader-like     |
| 101 | XLOC_008923 | linc1303.2_1_2      | 3.41967 | 0     | 1     | 0Leader-like     |
| 102 | XLOC_015323 | linc1346.2_1        | 3.46539 | 0.166 | 0.834 | 0Leader-like     |
| 103 | XLOC_021554 | linc1588.2_1        | 3.59485 | 0     | 1     | 0Leader-like     |
| 104 | XLOC_015913 | linc1543.2_1        | 3.6301  | 0     | 1     | 0Leader-like     |
| 105 | XLOC_008124 | linc1609.2_1        | 3.92998 | 0.114 | 0.886 | 0Leader-like     |
| 106 | XLOC_009164 | linc1613.2_2        | 3.93304 | 0     | 1     | 0Leader-like     |
| 107 | XLOC_003024 | linc1450.2_1        | 4.16476 | 0     | 1     | 0Leader-like     |
| 108 | XLOC_014484 | linc1624.2_1        | 4.39066 | 0.204 | 0.796 | 0Leader-like     |
| 109 | XLOC_005726 | linc1281.2_1        | 4.44797 | 0     | 1     | 0Leader-like     |
| 110 | XLOC_011113 | linc1617.2_1        | 4.59842 | 0.036 | 0.964 | 0Leader-like     |
| 111 | XLOC_017260 | linc1560.2_1        | 5.0251  | 0.23  | 0.768 | 0.002Leader-like |
| 112 | XLOC_000423 | linc1423.2_1_2      | 5.2054  | 0.042 | 0.958 | 0Leader-like     |
| 113 | XLOC_000422 | linc1422.2_93_94_95 | 5.34378 | 0     | 1     | 0Leader-like     |
| 114 | XLOC_020458 | linc1582.2_1_2      | 5.40348 | 0.012 | 0.988 | 0Leader-like     |
| 115 | XLOC_004203 | linc1605.2_1        | 5.5395  | 0     | 1     | 0Leader-like     |
| 116 | XLOC_023435 | linc1412.2_2        | 5.55574 | 0     | 1     | 0Leader-like     |
| 117 | XLOC_012670 | linc1328.2_1        | 5.61459 | 0     | 1     | 0Leader-like     |
| 118 | XLOC_002974 | linc1448.2_1        | 5.70687 | 0.124 | 0.868 | 0.008Leader-like |
| 119 | XLOC_015582 | linc1537.2_1        | 5.76334 | 0.216 | 0.784 | 0Leader-like     |
| 120 | XLOC_004958 | linc1460.2_2        | 5.96509 | 0.016 | 0.984 | 0Leader-like     |
| 121 | XLOC_023498 | linc1413.2_3_4      | 6.10064 | 0.002 | 0.998 | 0Leader-like     |
| 122 | XLOC_017223 | linc1558.2_2        | 6.23719 | 0.016 | 0.984 | 0Leader-like     |
| 123 | XLOC_019989 | linc1389.2_1_2      | 6.27955 | 0.006 | 0.994 | 0Leader-like     |
| 124 | XLOC_007489 | linc1294.2_1        | 6.63289 | 0.138 | 0.862 | 0Leader-like     |
| 125 | XLOC_007720 | linc1484.2_1        | 6.73035 | 0     | 1     | 0Leader-like     |
| 126 | XLOC_016334 | linc1354.2_1        | 7.26459 | 0.004 | 0.996 | 0Leader-like     |
| 127 | XLOC_023180 | linc1408.2_1_2      | 7.34816 | 0.012 | 0.988 | 0Leader-like     |
| 128 | XLOC_011521 | linc1511.2_1_2      | 7.59538 | 0     | 1     | 0Leader-like     |
| 129 | XLOC_015405 | linc1533.2_1        | 7.60122 | 0.012 | 0.988 | 0Leader-like     |
| 130 | XLOC_013460 | linc1333.2_1        | 8.33002 | 0.01  | 0.99  | 0Leader-like     |
| 131 | XLOC_007934 | linc1611.2_1        | 8.92259 | 0.104 | 0.896 | 0Leader-like     |
| 132 | XLOC_009710 | linc1315.2_1        | 9.23914 | 0.002 | 0.998 | 0Leader-like     |
| 133 | XLOC_012658 | linc1619.2_1        | 10.5673 | 0     | 1     | 0Leader-like     |
| 134 | XLOC_005787 | linc1283.2_1_1      | 11.7221 | 0.398 | 0.602 | 0Leader-like     |
| 135 | XLOC_023098 | linc1406.2_1        | 13.5835 | 0     | 1     | 0Leader-like     |
| 136 | XLOC_015583 | linc1538.2_1        | 14.276  | 0.002 | 0.998 | 0Leader-like     |
| 137 | XLOC_012755 | linc1620.2_1        | 15.0508 | 0     | 1     | 0Leader-like     |
| 138 | XLOC_003311 | linc1257.2_1        | 15.1276 | 0.04  | 0.96  | 0Leader-like     |
| 139 | XLOC_017356 | linc1359.2_3_4      | 15.6068 | 0.008 | 0.992 | 0Leader-like     |
| 140 | XLOC_003211 | linc1451.2_1        | 15.7753 | 0     | 1     | 0Leader-like     |
| 141 | XLOC_012675 | linc1329.2_2        | 16.2993 | 0     | 1     | 0Leader-like     |
| 142 | XLOC_016896 | linc1547.2_1        | 16.4443 | 0.152 | 0.848 | 0Leader-like     |
| 143 | XLOC_009568 | linc1614.2_1        | 17.687  | 0.012 | 0.988 | 0Leader-like     |
| 144 | XLOC_001657 | linc1435.2_1        | 23.4318 | 0.108 | 0.892 | 0Leader-like     |
| 145 | XLOC_016784 | linc1545.2_1        | 34.7786 | 0.002 | 0.998 | 0Leader-like     |

|     |             |                |         |       |       |              |
|-----|-------------|----------------|---------|-------|-------|--------------|
| 146 | XLOC_005325 | linc2096.2_4   | 34.9166 | 0     | 1     | 0Leader-like |
| 147 | XLOC_002238 | linc1252.2_1   | 38.2363 | 0.48  | 0.52  | 0Leader-like |
| 148 | XLOC_011335 | linc1509.2_2_3 | 52.868  | 0.326 | 0.674 | 0Leader-like |
| 149 | XLOC_000476 | linc1425.2_1_2 | 93.1264 | 0.002 | 0.998 | 0Leader-like |
| 150 | XLOC_020295 | linc1391.2_2_3 | 183.261 | 0.002 | 0.998 | 0Leader-like |
| 151 | XLOC_009192 | linc1307.2_2   | 424.394 | 0.004 | 0.996 | 0Leader-like |
| 152 | XLOC_005245 | linc1465.2_1_2 | 1.29714 | 0.026 | 0.052 | 0.922Coding  |
| 153 | XLOC_020904 | linc1394.2_1   | 1.3171  | 0     | 0.002 | 0.998Coding  |
| 154 | XLOC_014819 | linc1622.2_1   | 1.89226 | 0.034 | 0.056 | 0.91Coding   |
| 155 | XLOC_018235 | linc1563.2_1   | 2.06221 | 0     | 0.002 | 0.998Coding  |
| 156 | XLOC_015693 | linc1540.2_1   | 2.14081 | 0     | 0.002 | 0.998Coding  |
| 157 | XLOC_018322 | linc1565.2_1   | 2.29785 | 0.002 | 0.004 | 0.994Coding  |
| 158 | XLOC_005221 | linc1463.2_1   | 3.54802 | 0.012 | 0.436 | 0.552Coding  |
| 159 | XLOC_001648 | linc1434.2_1   | 3.67314 | 0     | 0     | 1Coding      |
| 160 | XLOC_008722 | linc1493.2_1   | 4.40672 | 0.01  | 0.484 | 0.506Coding  |
| 161 | XLOC_019546 | linc1386.2_1   | 7.02877 | 0.056 | 0.042 | 0.902Coding  |
| 162 | XLOC_019254 | linc1379.2_13  | 7.51859 | 0     | 0.004 | 0.996Coding  |
| 163 | XLOC_018329 | linc1566.2_1   | 8.03656 | 0     | 0.056 | 0.944Coding  |
| 164 | XLOC_019376 | linc1382.2_1   | 9.94269 | 0     | 0.028 | 0.972Coding  |
| 165 | XLOC_023228 | linc1409.2_15  | 12.3964 | 0     | 0     | 1Coding      |
| 166 | XLOC_020896 | linc1393.2_1   | 65.6662 | 0.052 | 0.284 | 0.664Coding  |
| 167 | XLOC_015133 | linc1343.2_2   | 329.966 | 0.014 | 0.136 | 0.85Coding   |
